# Supplementary material
Source: MDPI journal article supplement (https://www.mdpi.com/1996-1073/16/9/3730)
Supplement: s1 [file s1]

## Supplementary Information

# An Ab Initio RRKM-Based Master Equation Study for Kinetics of OH-Initiated Oxidation of 2-Methyltetrahydrofuran and Its Implications in Kinetic Modeling

Tam V.-T. Mai <sup>1,2,†</sup>, Thanh Q. Bui <sup>3,‡</sup>, Nguyen Thi Ai Nhung <sup>3,\*</sup>, Phan Tu Quy <sup>4</sup>, Krishna Prasad Shrestha <sup>5,‡</sup>,  
Fabian Mauss <sup>5</sup>, Binod Raj Giri <sup>6,\*</sup> and Lam K. Huynh <sup>7,8,\*</sup>

<sup>1</sup> Institute of Fundamental and Applied Sciences, Duy Tan University, 06 Tran Nhat Duat, Tan Dinh Ward, District 1, Ho Chi Minh City 700000, Vietnam

<sup>2</sup> Faculty of Natural Sciences, Duy Tan University, Da Nang City 550000, Vietnam

<sup>3</sup> Department of Chemistry, University of Sciences, Hue University, Hue City 530000, Vietnam

<sup>4</sup> Department of Natural Sciences & Technology, Tay Nguyen University, Buon Ma Thuot City 630000, Vietnam

<sup>5</sup> Thermodynamics and Thermal Process Engineering, Brandenburg University of Technology, Siemens-Halske-Ring 8, 03046 Cottbus, Germany

<sup>6</sup> Physical Science and Engineering Division, Clean Combustion Research Center, King Abdullah University of Science and Technology (KAUST), Thuwal 23955-6900, Saudi Arabia

<sup>7</sup> School of Chemical and Environmental Engineering, International University, Quarter 6, Linh Trung Ward, Thu Duc City, Ho Chi Minh City 700000, Vietnam

<sup>8</sup> Vietnam National University, Ho Chi Minh City 700000, Vietnam

\* Correspondence: ntanhung@hueuni.edu.vn (N.T.A.N.); binod.giri@kaust.edu.sa (B.R.G.); hklam@hcmiu.edu.vn (L.K.H.); Tel.: +84-(8)-2211-4046 (ext. 3233) (L.K.H.); Fax: +84-(8)-3724-4271 (L.K.H.)

† These authors contributed equally to this work.

‡ Current address: Los Alamos National Laboratory, Los Alamos, NM 87545, USA.

## Contents

|                                                                                                                                                                                                                                                                                                                                                                                                                                                                                                                                                                                                                         |    |
|-------------------------------------------------------------------------------------------------------------------------------------------------------------------------------------------------------------------------------------------------------------------------------------------------------------------------------------------------------------------------------------------------------------------------------------------------------------------------------------------------------------------------------------------------------------------------------------------------------------------------|----|
| <b>Table S1:</b> Optimized geometries, electronic energies at 0 K ( $E_{elec}^{0K}$ ), zero-point energy (ZPE) corrections and harmonic wavenumbers of the species involved with the lowest-energy conformer of a given species, calculated at CCSD(T)/cc-pVTZ//M06-2X/aug-cc-pVTZ level of theory for the title reaction. ....                                                                                                                                                                                                                                                                                         | 3  |
| <b>Table S2:</b> T1 diagnostics for the species involved in 2MTHF + OH reaction calculated at CCSD(T)/cc-pVTZ based on the M06-2X/aug-cc-pVTZ geometries.....                                                                                                                                                                                                                                                                                                                                                                                                                                                           | 13 |
| <b>Table S3:</b> Calculated global rate constants, $k_{tot}$ , of the 2MTHF + OH $\rightarrow$ products over the range of temperature 200 – 2000 K at different pressures, including the HIR treatments and Eckart quantum tunneling effects. Units are in cm <sup>3</sup> /molecule/s. The $k_{tot}(T, P)$ at different pressures are fitted as the double-modified Arrhenius formats.....                                                                                                                                                                                                                             | 14 |
| <b>Table S4:</b> The calculated Eckart tunneling factor via tight transition state channels over the wide range of temperature 200 – 2000 K. ....                                                                                                                                                                                                                                                                                                                                                                                                                                                                       | 15 |
| <b>Table S5:</b> Calculated overall rate constants, $k_{tot}$ , of the 2MTHF + OH $\rightarrow$ products over the range of temperature 200 – 2000 K at $P = 760$ Torr with and without HIR treatments based on M06-2X/aug-cc-pVTZ level of theory. Units are in cm <sup>3</sup> /molecule/s.....                                                                                                                                                                                                                                                                                                                        | 16 |
| <b>Table S6:</b> Calculated NASA coefficients for the thermodynamic properties of various species in the reaction of OH radicals with 2MTHF.....                                                                                                                                                                                                                                                                                                                                                                                                                                                                        | 17 |
| <b>Figure S1:</b> M06-2X/aug-cc-pVTZ optimized geometries for the species involved in the title reaction. All structures were obtained for the lowest-energy conformer of a given species. Bond lengths and bond angles are in Å and degree (°), respectively. <sup>a, b</sup> are taken from the experimental data[1, 3], respectively. ....                                                                                                                                                                                                                                                                           | 22 |
| <b>Figure S2:</b> Hindrance potentials for the species involved in the 2MTHF + OH reaction, calculated at M06-2X/cc-pVDZ level of theory. ....                                                                                                                                                                                                                                                                                                                                                                                                                                                                          | 29 |
| <b>Figure S3:</b> Effects of updated rate coefficients for OH/HO <sub>2</sub> + 2MTHF $\rightarrow$ products on the prediction of the ignition delay times of 2MTHF/air mixtures at 20 bar and $\phi = 0.5$ . The experimental data are taken from Tripathi et al. [4]. The comparison of the various scenarios for the performance of the kinetic model is shown. The red line shows the performance of the updated kinetic model from this work with the rate coefficients for OH + 2MTHF $\rightarrow$ products (this work) and HO <sub>2</sub> + 2MTHF $\rightarrow$ products (Chakravarty and Fernandes [5])...... | 30 |
| <b>Figure S4:</b> Optimized TSs and corresponding RCs obtained at M06-2X/aug-cc-pVTZ level.....                                                                                                                                                                                                                                                                                                                                                                                                                                                                                                                         | 33 |
| <b>Figure S5:</b> Simplified PES for the formation of RCs from 2MTHF and OH radical (+ZPE, 0 K) calculated at CCSD(T)/cc-pVTZ//M06-2X/aug-cc-pVTZ. ....                                                                                                                                                                                                                                                                                                                                                                                                                                                                 | 33 |
| <b>Figure S6:</b> Comparison of the computed global rate constants (2MTHF + OH $\rightarrow$ products) using one-RC (RCa) and two-RC models (RCa & RCb) at $P = 760$ Torr. ....                                                                                                                                                                                                                                                                                                                                                                                                                                         | 34 |

**Table S1:** Optimized geometries, electronic energies at 0 K ( $E_{elec}^{0K}$ ), zero-point energy (ZPE) corrections and harmonic wavenumbers of the species involved with the lowest-energy conformer of a given species, calculated at CCSD(T)/cc-pVTZ//M06-2X/aug-cc-pVTZ level of theory for the title reaction.

| Species                                     | Cartesian coordinate (Å) |              |              |              | $E_{elec}^{0K}$ (Hartree) | ZPE (Hartree) | Unscaled vibrational frequencies (cm <sup>-1</sup> )                      |           |           |
|---------------------------------------------|--------------------------|--------------|--------------|--------------|---------------------------|---------------|---------------------------------------------------------------------------|-----------|-----------|
| <b>OH</b><br>(C <sub>∞v</sub> )             | 8                        | 0.000000000  | 0.000000000  | 0.107999000  | -75.637723                | 0.008530      | 3742.0378 (3737.8)[1]                                                     |           |           |
|                                             | 1                        | 0.000000000  | 0.000000000  | -0.863995000 |                           |               |                                                                           |           |           |
| <b>H<sub>2</sub>O</b><br>(C <sub>2v</sub> ) | 8                        | 0.000000000  | 0.000000000  | 0.116332000  | -76.332140                | 0.021565      | 1615.7190      3873.1681      3977.2474<br>(1595.0; 3657.0[2]; 3756.0[1]) |           |           |
|                                             | 1                        | 0.000000000  | 0.762680000  | -0.465326000 |                           |               |                                                                           |           |           |
|                                             | 1                        | 0.000000000  | -0.762680000 | -0.465326000 |                           |               |                                                                           |           |           |
| <b>2MTHF</b><br>(C <sub>1</sub> )           | 6                        | 1.359420000  | -0.833589000 | 0.167257000  | -271.304799               | 0.145654      | 45.9007                                                                   | 198.9607  | 241.7856  |
|                                             | 8                        | -0.016915000 | -1.130708000 | -0.051144000 |                           |               | 321.6648                                                                  | 472.9320  | 564.5336  |
|                                             | 6                        | -0.730955000 | 0.054869000  | -0.395401000 |                           |               | 661.9380                                                                  | 833.1459  | 879.1904  |
|                                             | 6                        | 0.118034000  | 1.189529000  | 0.162632000  |                           |               | 888.9693                                                                  | 920.2310  | 944.3517  |
|                                             | 6                        | 1.528959000  | 0.665808000  | -0.091771000 |                           |               | 994.3893                                                                  | 1021.6762 | 1068.1326 |
|                                             | 1                        | 1.607918000  | -1.090231000 | 1.199633000  |                           |               | 1152.2294                                                                 | 1168.3976 | 1181.5757 |
|                                             | 1                        | 1.972108000  | -1.445694000 | -0.495743000 |                           |               | 1204.9369                                                                 | 1227.3689 | 1268.3241 |
|                                             | 1                        | -0.768082000 | 0.138844000  | -1.489675000 |                           |               | 1308.7387                                                                 | 1339.2186 | 1362.9386 |
|                                             | 1                        | -0.087281000 | 2.144638000  | -0.316830000 |                           |               | 1396.3646                                                                 | 1399.8296 | 1422.9779 |
|                                             | 1                        | -0.069778000 | 1.288067000  | 1.234277000  |                           |               | 1485.9086                                                                 | 1488.4901 | 1501.7979 |
|                                             | 1                        | 1.810933000  | 0.843931000  | -1.129853000 |                           |               | 1504.1545                                                                 | 1540.0299 | 2996.4629 |
|                                             | 1                        | 2.285478000  | 1.115172000  | 0.547558000  |                           |               | 3053.4140                                                                 | 3064.1249 | 3067.6243 |
|                                             | 6                        | -2.135363000 | -0.037456000 | 0.153997000  |                           |               | 3080.3042                                                                 | 3097.6805 | 3135.1959 |
|                                             | 1                        | -2.705986000 | 0.853177000  | -0.110192000 |                           |               | 3139.0330                                                                 | 3143.7821 | 3146.1076 |
|                                             | 1                        | -2.646925000 | -0.909459000 | -0.250195000 |                           |               |                                                                           |           |           |
|                                             | 1                        | -2.103637000 | -0.127747000 | 1.239886000  |                           |               |                                                                           |           |           |
| <b>RC</b><br>(C <sub>1</sub> )              | 6                        | 0.769120000  | -0.766597000 | -0.123486000 | -346.955251               | 0.157496      | 67.5885                                                                   | 84.5772   | 112.7911  |
|                                             | 8                        | 0.017971000  | -0.020735000 | -1.084381000 |                           |               | 157.0109                                                                  | 233.0870  | 253.0762  |
|                                             | 6                        | -1.343030000 | -0.386907000 | -0.881629000 |                           |               | 322.8405                                                                  | 453.4482  | 492.6279  |
|                                             | 6                        | -1.513502000 | -0.549168000 | 0.639698000  |                           |               | 575.3928                                                                  | 596.7120  | 679.8552  |
|                                             | 6                        | -0.063705000 | -0.654837000 | 1.154919000  |                           |               | 803.2187                                                                  | 861.2955  | 905.0323  |
|                                             | 1                        | 0.793942000  | -1.812035000 | -0.456659000 |                           |               | 918.2873                                                                  | 941.0198  | 1001.3474 |
|                                             | 1                        | -1.966397000 | 0.393724000  | -1.311455000 |                           |               | 1043.6887                                                                 | 1079.3276 | 1139.8243 |
|                                             | 1                        | -1.540976000 | -1.327298000 | -1.403842000 |                           |               | 1166.2272                                                                 | 1176.4978 | 1229.9926 |
|                                             | 1                        | -2.014930000 | 0.314701000  | 1.069086000  |                           |               | 1257.4769                                                                 | 1281.8835 | 1301.9181 |
|                                             | 1                        | -2.101403000 | -1.433719000 | 0.874393000  |                           |               | 1325.7270                                                                 | 1366.3804 | 1390.1562 |
|                                             | 1                        | 0.221027000  | 0.253389000  | 1.689053000  |                           |               | 1398.7135                                                                 | 1428.6246 | 1491.7927 |

| Species                   | Cartesian coordinate<br>(Å) |              |              |              | $E_{elec}^0$ (Hartree) | ZPE<br>(Hartree) | Unscaled vibrational frequencies (cm <sup>-1</sup> ) |           |           |
|---------------------------|-----------------------------|--------------|--------------|--------------|------------------------|------------------|------------------------------------------------------|-----------|-----------|
|                           | 1                           | 0.094384000  | -1.501643000 | 1.819383000  |                        |                  | 1494.0771                                            | 1502.0461 | 1513.3208 |
|                           | 8                           | -0.162083000 | 2.395508000  | 0.293215000  |                        |                  | 1528.8135                                            | 3007.5952 | 3045.1472 |
|                           | 1                           | -0.001145000 | 1.743806000  | -0.424275000 |                        |                  | 3065.8949                                            | 3075.5715 | 3103.9203 |
|                           | 6                           | 2.169404000  | -0.211059000 | -0.038297000 |                        |                  | 3130.1950                                            | 3137.1276 | 3140.1763 |
|                           | 1                           | 2.748412000  | -0.774396000 | 0.692941000  |                        |                  | 3149.1828                                            | 3155.1112 | 3547.1860 |
|                           | 1                           | 2.671136000  | -0.276275000 | -1.002273000 |                        |                  |                                                      |           |           |
|                           | 1                           | 2.139126000  | 0.832965000  | 0.275753000  |                        |                  |                                                      |           |           |
| TS1<br>(C <sub>i</sub> )  | 6                           | 1.463583000  | 0.069377000  | -0.882896000 | -346.946041            | 0.153706         | -625.7975                                            | 51.9506   | 64.4149   |
|                           | 8                           | 0.059066000  | -0.069497000 | -1.124038000 |                        |                  | 126.4005                                             | 202.3738  | 228.5237  |
|                           | 6                           | -0.618821000 | -0.326123000 | 0.087476000  |                        |                  | 277.4985                                             | 313.9585  | 442.7778  |
|                           | 6                           | 0.433495000  | -0.871989000 | 1.037379000  |                        |                  | 563.9336                                             | 649.7834  | 663.1653  |
|                           | 6                           | 1.656132000  | -0.054226000 | 0.629304000  |                        |                  | 832.6715                                             | 877.6092  | 884.9834  |
|                           | 1                           | 1.978842000  | -0.726363000 | -1.424146000 |                        |                  | 921.3035                                             | 944.1358  | 979.0006  |
|                           | 1                           | 1.798876000  | 1.029730000  | -1.274486000 |                        |                  | 1021.5887                                            | 1031.3445 | 1087.5553 |
|                           | 1                           | -0.958531000 | 0.680097000  | 0.511488000  |                        |                  | 1164.2304                                            | 1179.8193 | 1191.6683 |
|                           | 1                           | 0.155537000  | -0.752279000 | 2.081940000  |                        |                  | 1227.6980                                            | 1260.5203 | 1283.6131 |
|                           | 1                           | 0.583134000  | -1.935411000 | 0.831792000  |                        |                  | 1295.6237                                            | 1347.9050 | 1357.2538 |
|                           | 1                           | 1.612218000  | 0.928672000  | 1.096675000  |                        |                  | 1397.8581                                            | 1408.9772 | 1481.1227 |
|                           | 1                           | 2.602096000  | -0.523622000 | 0.888262000  |                        |                  | 1484.6560                                            | 1495.0628 | 1501.5612 |
|                           | 8                           | -0.951432000 | 2.245005000  | 0.407851000  |                        |                  | 1535.8429                                            | 1956.6451 | 3057.8345 |
|                           | 1                           | -0.764950000 | 2.172815000  | -0.543213000 |                        |                  | 3062.8799                                            | 3063.8880 | 3094.1175 |
|                           | 6                           | -1.840775000 | -1.171345000 | -0.163873000 |                        |                  | 3107.9338                                            | 3137.5791 | 3142.5922 |
|                           | 1                           | -2.389344000 | -1.326064000 | 0.764234000  |                        |                  | 3151.7563                                            | 3152.9318 | 3762.7979 |
|                           | 1                           | -2.499741000 | -0.685672000 | -0.881317000 |                        |                  |                                                      |           |           |
|                           | 1                           | -1.540896000 | -2.140127000 | -0.566076000 |                        |                  |                                                      |           |           |
| TS2a<br>(C <sub>i</sub> ) | 6                           | 1.449317000  | -0.678847000 | -0.660750000 | -346.941814            | 0.153159         | -987.6041                                            | 69.4333   | 134.3607  |
|                           | 8                           | 0.056050000  | -0.774887000 | -0.949444000 |                        |                  | 146.2876                                             | 201.8288  | 225.7041  |
|                           | 6                           | -0.631788000 | -0.775296000 | 0.296137000  |                        |                  | 311.4897                                             | 389.7924  | 463.6943  |
|                           | 6                           | 0.119156000  | 0.281449000  | 1.081958000  |                        |                  | 545.5848                                             | 697.7311  | 759.1570  |
|                           | 6                           | 1.571541000  | 0.033301000  | 0.706357000  |                        |                  | 825.2120                                             | 872.2465  | 899.5954  |
|                           | 1                           | 1.883997000  | -1.680706000 | -0.623663000 |                        |                  | 914.0041                                             | 933.7682  | 1000.4778 |
|                           | 1                           | 1.916997000  | -0.126353000 | -1.472939000 |                        |                  | 1035.0072                                            | 1063.5521 | 1084.9447 |
|                           | 1                           | -0.482246000 | -1.750188000 | 0.786268000  |                        |                  | 1161.9835                                            | 1169.1599 | 1193.0773 |
|                           | 1                           | -0.185527000 | 1.313442000  | 0.597106000  |                        |                  | 1206.6262                                            | 1243.9258 | 1269.0586 |
|                           | 1                           | -0.107823000 | 0.352902000  | 2.143097000  |                        |                  | 1284.6432                                            | 1311.8142 | 1344.7193 |
|                           | 1                           | 2.138506000  | 0.958938000  | 0.642017000  |                        |                  | 1384.7360                                            | 1394.6731 | 1423.6140 |

| Species                   | Cartesian coordinate<br>(Å) |              |              |              | $E_{elec}^0$ (Hartree) | ZPE<br>(Hartree) | Unscaled vibrational frequencies (cm <sup>-1</sup> ) |           |           |
|---------------------------|-----------------------------|--------------|--------------|--------------|------------------------|------------------|------------------------------------------------------|-----------|-----------|
|                           | 1                           | 2.056921000  | -0.610990000 | 1.439581000  |                        |                  | 1490.2744                                            | 1493.2578 | 1500.6427 |
|                           | 8                           | -0.297384000 | 2.212463000  | -0.469148000 |                        |                  | 1531.7653                                            | 1619.2842 | 2969.0366 |
|                           | 1                           | -0.295276000 | 1.534143000  | -1.167224000 |                        |                  | 3054.3760                                            | 3073.2120 | 3086.0102 |
|                           | 6                           | -2.104627000 | -0.536981000 | 0.068897000  |                        |                  | 3123.4318                                            | 3142.5923 | 3144.2845 |
|                           | 1                           | -2.515839000 | -1.309122000 | -0.578736000 |                        |                  | 3147.8459                                            | 3155.1900 | 3736.0751 |
|                           | 1                           | -2.636788000 | -0.561568000 | 1.019356000  |                        |                  |                                                      |           |           |
|                           | 1                           | -2.263840000 | 0.437133000  | -0.391718000 |                        |                  |                                                      |           |           |
| TS2b<br>(C <sub>i</sub> ) | 6                           | 0.042953000  | 1.452563000  | -0.498016000 | -346.940355            | 0.153069         | -1002.2764                                           | 75.7373   | 111.6627  |
|                           | 8                           | 0.240078000  | 0.210267000  | -1.175850000 |                        |                  | 141.1508                                             | 199.5973  | 210.4501  |
|                           | 6                           | 0.616449000  | -0.767530000 | -0.209290000 |                        |                  | 310.8319                                             | 407.8069  | 435.5955  |
|                           | 6                           | -0.255615000 | -0.408238000 | 0.979228000  |                        |                  | 620.7577                                             | 714.2494  | 771.2196  |
|                           | 6                           | -0.256347000 | 1.113404000  | 0.977038000  |                        |                  | 823.3336                                             | 871.5684  | 905.8197  |
|                           | 1                           | 0.937132000  | 2.072533000  | -0.592053000 |                        |                  | 913.0506                                             | 940.7253  | 989.1461  |
|                           | 1                           | -0.783760000 | 1.962407000  | -0.988980000 |                        |                  | 1021.3468                                            | 1052.1156 | 1085.6162 |
|                           | 1                           | 0.357654000  | -1.738888000 | -0.631294000 |                        |                  | 1095.6309                                            | 1159.0120 | 1174.7941 |
|                           | 1                           | -1.341269000 | -0.753394000 | 0.687275000  |                        |                  | 1212.5678                                            | 1245.2509 | 1252.5322 |
|                           | 1                           | -0.014609000 | -0.894832000 | 1.921689000  |                        |                  | 1284.5007                                            | 1310.9763 | 1340.4255 |
|                           | 1                           | -1.210288000 | 1.517233000  | 1.308085000  |                        |                  | 1372.1371                                            | 1399.8548 | 1404.5163 |
|                           | 1                           | 0.518880000  | 1.504106000  | 1.636620000  |                        |                  | 1487.9172                                            | 1491.6358 | 1500.5330 |
|                           | 8                           | -2.425668000 | -0.848210000 | -0.192915000 |                        |                  | 1533.8655                                            | 1646.9705 | 3046.5590 |
|                           | 1                           | -1.931211000 | -0.570649000 | -0.984047000 |                        |                  | 3061.7453                                            | 3076.2382 | 3097.8721 |
|                           | 6                           | 2.105427000  | -0.708664000 | 0.097164000  |                        |                  | 3122.6255                                            | 3125.9296 | 3127.9265 |
|                           | 1                           | 2.379763000  | -1.491733000 | 0.803852000  |                        |                  | 3133.0280                                            | 3142.4826 | 3740.3790 |
|                           | 1                           | 2.677447000  | -0.847071000 | -0.818849000 |                        |                  |                                                      |           |           |
|                           | 1                           | 2.377776000  | 0.254615000  | 0.531079000  |                        |                  |                                                      |           |           |
| TS3a<br>(C <sub>i</sub> ) | 6                           | 1.137655000  | -0.409654000 | 0.019908000  | -346.941923            | 0.153449         | -983.3379                                            | 58.6392   | 125.7745  |
|                           | 8                           | 0.256691000  | -0.404105000 | -1.108834000 |                        |                  | 143.1145                                             | 257.2315  | 285.6182  |
|                           | 6                           | -0.915450000 | -1.093785000 | -0.716184000 |                        |                  | 343.0822                                             | 408.6677  | 460.5922  |
|                           | 6                           | -1.176193000 | -0.562115000 | 0.677077000  |                        |                  | 535.1456                                             | 657.7336  | 781.7737  |
|                           | 6                           | 0.221828000  | -0.432242000 | 1.268191000  |                        |                  | 830.8888                                             | 880.2149  | 907.7900  |
|                           | 1                           | 1.725785000  | -1.332741000 | -0.019656000 |                        |                  | 913.7854                                             | 959.2494  | 996.1269  |
|                           | 1                           | -1.702980000 | -0.874668000 | -1.433849000 |                        |                  | 1032.4268                                            | 1072.7913 | 1087.1109 |
|                           | 1                           | -0.736591000 | -2.177183000 | -0.697059000 |                        |                  | 1154.1931                                            | 1157.2915 | 1176.3134 |
|                           | 1                           | -1.587451000 | 0.528483000  | 0.519982000  |                        |                  | 1214.4671                                            | 1241.9522 | 1268.9146 |
|                           | 1                           | -1.915584000 | -1.090788000 | 1.273328000  |                        |                  | 1292.3520                                            | 1311.3398 | 1350.4705 |
|                           | 1                           | 0.325645000  | 0.478494000  | 1.856571000  |                        |                  | 1382.1740                                            | 1392.6926 | 1422.8751 |

| Species                   | Cartesian coordinate<br>(Å) |              |              |              | $E_{elec}^0$ (Hartree) | ZPE<br>(Hartree) | Unscaled vibrational frequencies (cm <sup>-1</sup> ) |           |           |
|---------------------------|-----------------------------|--------------|--------------|--------------|------------------------|------------------|------------------------------------------------------|-----------|-----------|
|                           | 1                           | 0.458236000  | -1.278565000 | 1.913023000  |                        |                  | 1491.1056                                            | 1492.9607 | 1501.1728 |
|                           | 8                           | -1.556114000 | 1.798322000  | -0.072341000 |                        |                  | 1513.5765                                            | 1652.0980 | 3004.1993 |
|                           | 1                           | -0.911234000 | 1.563961000  | -0.762922000 |                        |                  | 3026.6004                                            | 3063.5355 | 3082.4997 |
|                           | 6                           | 2.050364000  | 0.790328000  | -0.070947000 |                        |                  | 3126.8360                                            | 3135.9475 | 3137.5702 |
|                           | 1                           | 2.773273000  | 0.775742000  | 0.744374000  |                        |                  | 3144.8749                                            | 3148.8731 | 3731.9009 |
|                           | 1                           | 2.590984000  | 0.789733000  | -1.016028000 |                        |                  |                                                      |           |           |
|                           | 1                           | 1.466081000  | 1.708595000  | 0.003361000  |                        |                  |                                                      |           |           |
| TS3b<br>(C <sub>i</sub> ) | 6                           | -0.899102000 | -0.511751000 | -0.270524000 | -346.940806            | 0.153149         | -975.7793                                            | 50.9011   | 118.0245  |
|                           | 8                           | -0.250432000 | 0.567752000  | -0.966029000 |                        |                  | 127.3200                                             | 251.8839  | 271.7122  |
|                           | 6                           | 0.426506000  | 1.375838000  | -0.017474000 |                        |                  | 362.4641                                             | 393.5687  | 459.0685  |
|                           | 6                           | 0.928765000  | 0.379799000  | 1.001670000  |                        |                  | 516.4054                                             | 671.8782  | 795.9545  |
|                           | 6                           | -0.240498000 | -0.580149000 | 1.123158000  |                        |                  | 834.2318                                             | 869.8618  | 907.4358  |
|                           | 1                           | -0.682210000 | -1.415260000 | -0.842197000 |                        |                  | 913.8544                                             | 959.1713  | 983.9630  |
|                           | 1                           | 1.212037000  | 1.923690000  | -0.534180000 |                        |                  | 1025.2511                                            | 1043.7992 | 1086.7261 |
|                           | 1                           | -0.261901000 | 2.094571000  | 0.445969000  |                        |                  | 1131.5126                                            | 1153.0105 | 1178.5938 |
|                           | 1                           | 1.805666000  | -0.202302000 | 0.471521000  |                        |                  | 1205.3240                                            | 1230.2383 | 1282.5178 |
|                           | 1                           | 1.331320000  | 0.784420000  | 1.926941000  |                        |                  | 1285.2142                                            | 1307.4675 | 1355.7226 |
|                           | 1                           | 0.067943000  | -1.589875000 | 1.384032000  |                        |                  | 1375.3739                                            | 1396.4177 | 1412.0497 |
|                           | 1                           | -0.937045000 | -0.229003000 | 1.888676000  |                        |                  | 1486.1394                                            | 1490.0523 | 1500.6100 |
|                           | 8                           | 2.389228000  | -0.872921000 | -0.604506000 |                        |                  | 1519.1197                                            | 1636.2193 | 3009.1181 |
|                           | 1                           | 1.742358000  | -0.579439000 | -1.269797000 |                        |                  | 3058.7515                                            | 3060.4625 | 3077.2893 |
|                           | 6                           | -2.395566000 | -0.278663000 | -0.219838000 |                        |                  | 3129.3668                                            | 3130.4860 | 3138.8997 |
|                           | 1                           | -2.808245000 | -0.212790000 | -1.224847000 |                        |                  | 3146.4074                                            | 3149.0263 | 3735.8162 |
|                           | 1                           | -2.888408000 | -1.095123000 | 0.309397000  |                        |                  |                                                      |           |           |
|                           | 1                           | -2.612512000 | 0.652012000  | 0.306820000  |                        |                  |                                                      |           |           |
| TS4a<br>(C <sub>i</sub> ) | 6                           | -0.976392000 | 0.711388000  | 0.443304000  | -346.943185            | 0.153680         | -721.8573                                            | 62.1017   | 79.0519   |
|                           | 8                           | 0.010291000  | -0.001141000 | 1.194040000  |                        |                  | 103.4447                                             | 177.1481  | 244.5902  |
|                           | 6                           | 0.476473000  | -1.087741000 | 0.432631000  |                        |                  | 274.2281                                             | 352.8668  | 431.5253  |
|                           | 6                           | -0.527793000 | -1.336011000 | -0.699645000 |                        |                  | 644.4911                                             | 678.8224  | 722.6866  |
|                           | 6                           | -1.680008000 | -0.382743000 | -0.355634000 |                        |                  | 804.3246                                             | 837.6832  | 885.0968  |
|                           | 1                           | -1.635682000 | 1.175655000  | 1.176041000  |                        |                  | 915.0720                                             | 947.9282  | 980.5235  |
|                           | 1                           | 1.491082000  | -0.829817000 | -0.014292000 |                        |                  | 1026.0379                                            | 1054.9234 | 1092.3879 |
|                           | 1                           | 0.645678000  | -1.934354000 | 1.097708000  |                        |                  | 1117.3332                                            | 1167.2054 | 1223.9834 |
|                           | 1                           | -0.082626000 | -1.081957000 | -1.660584000 |                        |                  | 1226.2777                                            | 1245.5553 | 1302.3819 |
|                           | 1                           | -0.843116000 | -2.375691000 | -0.744021000 |                        |                  | 1325.0419                                            | 1335.5757 | 1371.1108 |
|                           | 1                           | -2.188012000 | 0.004200000  | -1.236725000 |                        |                  | 1387.3669                                            | 1414.1614 | 1443.3992 |

| Species                   | Cartesian coordinate<br>(Å) |              |              |              | $E_{elec}^0$ (Hartree) | ZPE<br>(Hartree) | Unscaled vibrational frequencies (cm <sup>-1</sup> ) |           |           |
|---------------------------|-----------------------------|--------------|--------------|--------------|------------------------|------------------|------------------------------------------------------|-----------|-----------|
|                           | 1                           | -2.412905000 | -0.883087000 | 0.276121000  |                        |                  | 1484.7242                                            | 1493.7173 | 1504.8623 |
|                           | 8                           | 2.658223000  | 0.124887000  | -0.397437000 |                        |                  | 1510.8467                                            | 1889.5126 | 3053.6243 |
|                           | 1                           | 2.420123000  | 0.728841000  | 0.325676000  |                        |                  | 3074.3108                                            | 3082.7469 | 3096.7534 |
|                           | 6                           | -0.331486000 | 1.774467000  | -0.429877000 |                        |                  | 3103.0465                                            | 3127.2581 | 3134.1203 |
|                           | 1                           | -1.095549000 | 2.349604000  | -0.953108000 |                        |                  | 3134.5392                                            | 3141.1446 | 3751.9927 |
|                           | 1                           | 0.255093000  | 2.458379000  | 0.183191000  |                        |                  |                                                      |           |           |
|                           | 1                           | 0.333031000  | 1.322100000  | -1.167505000 |                        |                  |                                                      |           |           |
| TS4b<br>(C <sub>i</sub> ) | 6                           | 0.858678000  | -0.378654000 | -0.275540000 | -346.944365            | 0.153822         | -720.2306                                            | 52.7329   | 60.6151   |
|                           | 8                           | 0.047455000  | -0.449811000 | 0.898281000  |                        |                  | 94.8836                                              | 159.5153  | 230.0948  |
|                           | 6                           | -0.963895000 | 0.511119000  | 0.765053000  |                        |                  | 261.3309                                             | 317.3224  | 472.4637  |
|                           | 6                           | -0.425159000 | 1.635364000  | -0.135221000 |                        |                  | 579.1332                                             | 671.6299  | 711.1800  |
|                           | 6                           | 0.962989000  | 1.118961000  | -0.542052000 |                        |                  | 770.0668                                             | 864.8673  | 883.2470  |
|                           | 1                           | 0.313808000  | -0.857529000 | -1.099722000 |                        |                  | 917.9744                                             | 944.9893  | 989.1730  |
|                           | 1                           | -1.860406000 | 0.033121000  | 0.247520000  |                        |                  | 1034.6095                                            | 1080.1268 | 1102.5760 |
|                           | 1                           | -1.297527000 | 0.814611000  | 1.755620000  |                        |                  | 1165.5851                                            | 1173.9354 | 1224.5907 |
|                           | 1                           | -1.069791000 | 1.765496000  | -1.002490000 |                        |                  | 1232.0296                                            | 1261.0294 | 1306.9093 |
|                           | 1                           | -0.376006000 | 2.585922000  | 0.391081000  |                        |                  | 1319.6809                                            | 1360.9242 | 1370.9717 |
|                           | 1                           | 1.214921000  | 1.341264000  | -1.576644000 |                        |                  | 1396.7488                                            | 1425.6809 | 1428.5337 |
|                           | 1                           | 1.737461000  | 1.539201000  | 0.101060000  |                        |                  | 1486.1088                                            | 1489.6949 | 1502.5958 |
|                           | 8                           | -2.510641000 | -1.102847000 | -0.599550000 |                        |                  | 1509.1991                                            | 1947.6908 | 3008.5196 |
|                           | 1                           | -2.003105000 | -1.779353000 | -0.121317000 |                        |                  | 3068.0717                                            | 3079.5553 | 3097.9334 |
|                           | 6                           | 2.162936000  | -1.090653000 | -0.017012000 |                        |                  | 3120.3869                                            | 3136.9539 | 3142.7843 |
|                           | 1                           | 1.991486000  | -2.139878000 | 0.217556000  |                        |                  | 3148.1256                                            | 3149.9076 | 3767.5360 |
|                           | 1                           | 2.802775000  | -1.032658000 | -0.897107000 |                        |                  |                                                      |           |           |
|                           | 1                           | 2.678576000  | -0.625763000 | 0.823225000  |                        |                  |                                                      |           |           |
| TS5<br>(C <sub>i</sub> )  | 6                           | -1.321407000 | 1.019655000  | -0.374889000 | -346.940455            | 0.152787         | -1115.9075                                           | 53.6060   | 91.2708   |
|                           | 8                           | -0.182475000 | 0.448131000  | -1.022808000 |                        |                  | 158.9474                                             | 219.0353  | 314.2150  |
|                           | 6                           | 0.108166000  | -0.838634000 | -0.467308000 |                        |                  | 370.0125                                             | 393.4764  | 476.9706  |
|                           | 6                           | -0.656341000 | -0.887333000 | 0.850213000  |                        |                  | 563.9547                                             | 653.9154  | 755.6514  |
|                           | 6                           | -1.904500000 | -0.078753000 | 0.508837000  |                        |                  | 844.5086                                             | 884.0785  | 888.7690  |
|                           | 1                           | -0.992109000 | 1.870215000  | 0.229109000  |                        |                  | 930.0111                                             | 939.4009  | 956.9562  |
|                           | 1                           | -2.014505000 | 1.378148000  | -1.134721000 |                        |                  | 1009.8776                                            | 1036.5584 | 1059.4434 |
|                           | 1                           | -0.286524000 | -1.603149000 | -1.150281000 |                        |                  | 1143.6103                                            | 1171.6517 | 1194.7301 |
|                           | 1                           | -0.867185000 | -1.905857000 | 1.169164000  |                        |                  | 1207.8868                                            | 1225.0252 | 1275.6389 |
|                           | 1                           | -0.072471000 | -0.383994000 | 1.622978000  |                        |                  | 1308.6668                                            | 1314.6735 | 1341.9945 |
|                           | 1                           | -2.608395000 | -0.689222000 | -0.057834000 |                        |                  | 1353.1872                                            | 1394.0017 | 1403.4066 |

| Species                  | Cartesian coordinate<br>(Å) |              |              |              | $E_{elec}^0$ (Hartree) | ZPE<br>(Hartree) | Unscaled vibrational frequencies (cm <sup>-1</sup> ) |           |           |
|--------------------------|-----------------------------|--------------|--------------|--------------|------------------------|------------------|------------------------------------------------------|-----------|-----------|
|                          | 1                           | -2.418256000 | 0.319901000  | 1.380394000  |                        |                  | 1455.2298                                            | 1487.1134 | 1501.2949 |
|                          | 6                           | 1.598152000  | -1.004827000 | -0.351044000 |                        |                  | 1530.0866                                            | 1534.9815 | 2992.7198 |
|                          | 1                           | 1.887652000  | -1.904203000 | 0.189565000  |                        |                  | 3041.9271                                            | 3076.6717 | 3082.5197 |
|                          | 1                           | 2.117010000  | -0.924890000 | -1.303177000 |                        |                  | 3103.4959                                            | 3112.5256 | 3141.5228 |
|                          | 1                           | 1.992418000  | -0.084210000 | 0.301616000  |                        |                  | 3148.2722                                            | 3177.4046 | 3744.9657 |
|                          | 8                           | 2.040155000  | 1.193188000  | 0.737718000  |                        |                  |                                                      |           |           |
|                          | 1                           | 1.456514000  | 1.536059000  | 0.039043000  |                        |                  |                                                      |           |           |
| PC1<br>(C <sub>1</sub> ) | 6                           | -0.665203000 | -1.007156000 | 0.943788000  | -346.9902578           | 0.156318         | 47.3646                                              | 59.3110   | 124.5372  |
|                          | 8                           | -0.009238000 | 0.273338000  | 0.946079000  |                        |                  | 138.1284                                             | 168.0050  | 176.7777  |
|                          | 6                           | 0.857153000  | 0.350662000  | -0.124583000 |                        |                  | 222.7764                                             | 265.8919  | 313.0034  |
|                          | 6                           | 0.945418000  | -0.980583000 | -0.794609000 |                        |                  | 352.6164                                             | 503.7227  | 569.5667  |
|                          | 6                           | -0.414363000 | -1.589762000 | -0.442357000 |                        |                  | 640.3204                                             | 812.4599  | 883.5283  |
|                          | 1                           | -0.213032000 | -1.616274000 | 1.728898000  |                        |                  | 906.4600                                             | 937.3057  | 946.0881  |
|                          | 1                           | -1.717746000 | -0.848832000 | 1.167274000  |                        |                  | 999.4456                                             | 1023.3006 | 1068.8118 |
|                          | 1                           | -2.078234000 | 1.762109000  | -1.241622000 |                        |                  | 1106.5581                                            | 1183.9236 | 1216.9788 |
|                          | 1                           | 1.122237000  | -0.900325000 | -1.865873000 |                        |                  | 1254.1993                                            | 1270.8053 | 1280.0560 |
|                          | 1                           | 1.762616000  | -1.581290000 | -0.368817000 |                        |                  | 1344.3253                                            | 1360.1803 | 1404.6118 |
|                          | 1                           | -1.176140000 | -1.229832000 | -1.132427000 |                        |                  | 1419.3490                                            | 1471.2650 | 1481.4862 |
|                          | 1                           | -0.419073000 | -2.676966000 | -0.440020000 |                        |                  | 1489.7734                                            | 1497.4346 | 1526.5725 |
|                          | 8                           | -2.336770000 | 1.311963000  | -0.435248000 |                        |                  | 1632.0386                                            | 2975.2822 | 2991.2808 |
|                          | 1                           | -1.528852000 | 1.259788000  | 0.090848000  |                        |                  | 3065.5733                                            | 3097.1156 | 3097.7170 |
|                          | 6                           | 1.976589000  | 1.306996000  | 0.038612000  |                        |                  | 3118.1487                                            | 3140.4858 | 3144.3883 |
|                          | 1                           | 2.486145000  | 1.458316000  | -0.911749000 |                        |                  | 3156.4244                                            | 3793.3595 | 3937.0672 |
|                          | 1                           | 1.616567000  | 2.270477000  | 0.398637000  |                        |                  |                                                      |           |           |
|                          | 1                           | 2.716022000  | 0.939475000  | 0.763099000  |                        |                  |                                                      |           |           |
| PC2<br>(C <sub>1</sub> ) | 6                           | 1.230240000  | -0.688764000 | -0.827116000 | -346.9809593           | 0.155681         | 54.3122                                              | 85.6147   | 146.0368  |
|                          | 8                           | -0.044122000 | -0.102579000 | -1.074593000 |                        |                  | 160.5524                                             | 202.4440  | 223.5776  |
|                          | 6                           | -0.956706000 | -0.679328000 | -0.137351000 |                        |                  | 242.7924                                             | 297.4608  | 320.2358  |
|                          | 6                           | -0.117920000 | -0.889920000 | 1.080206000  |                        |                  | 362.9888                                             | 495.5373  | 571.3663  |
|                          | 6                           | 1.323592000  | -0.842756000 | 0.699227000  |                        |                  | 661.7039                                             | 677.7244  | 859.0433  |
|                          | 1                           | 1.282517000  | -1.665364000 | -1.318066000 |                        |                  | 866.1196                                             | 915.3002  | 948.0267  |
|                          | 1                           | 1.986196000  | -0.031677000 | -1.249311000 |                        |                  | 1004.2975                                            | 1038.3556 | 1052.5863 |
|                          | 1                           | -1.294398000 | -1.648966000 | -0.540156000 |                        |                  | 1083.1749                                            | 1149.3149 | 1153.9705 |
|                          | 1                           | 0.393248000  | 2.195805000  | 1.073346000  |                        |                  | 1208.3106                                            | 1266.8659 | 1299.0365 |
|                          | 1                           | -0.506966000 | -1.227682000 | 2.027292000  |                        |                  | 1304.1569                                            | 1340.7523 | 1375.5939 |
|                          | 1                           | 1.834396000  | 0.016556000  | 1.143469000  |                        |                  | 1400.7435                                            | 1411.2001 | 1477.4046 |



| Species                  | Cartesian coordinate<br>(Å) |              |              |              | $E_{elec}^0$ (Hartree) | ZPE<br>(Hartree) | Unscaled vibrational frequencies (cm <sup>-1</sup> ) |           |           |
|--------------------------|-----------------------------|--------------|--------------|--------------|------------------------|------------------|------------------------------------------------------|-----------|-----------|
|                          | 1                           | 1.877367000  | -1.737524000 | 0.990228000  |                        |                  | 1488.8646                                            | 1498.4456 | 1520.7231 |
|                          | 8                           | 0.732006000  | 2.386871000  | 0.195877000  |                        |                  | 1644.8937                                            | 2941.4291 | 3039.0539 |
|                          | 1                           | 0.363113000  | 1.691185000  | -0.366671000 |                        |                  | 3043.5966                                            | 3068.4343 | 3083.3567 |
|                          | 6                           | -2.157360000 | 0.229519000  | 0.028096000  |                        |                  | 3144.2275                                            | 3147.1222 | 3150.7510 |
|                          | 1                           | -2.662138000 | 0.365307000  | -0.926924000 |                        |                  | 3242.6153                                            | 3745.0860 | 3920.9943 |
|                          | 1                           | -2.860437000 | -0.209258000 | 0.735148000  |                        |                  |                                                      |           |           |
|                          | 1                           | -1.847041000 | 1.204778000  | 0.403007000  |                        |                  |                                                      |           |           |
| PC3<br>(C <sub>1</sub> ) | 6                           | 0.913691000  | -0.661679000 | -0.141752000 | -346.9818076           | 0.155318         | 61.3776                                              | 78.2587   | 138.9862  |
|                          | 8                           | -0.015402000 | -0.111448000 | -1.082775000 |                        |                  | 162.3043                                             | 199.3614  | 222.3904  |
|                          | 6                           | -1.282285000 | -0.699468000 | -0.813616000 |                        |                  | 247.7392                                             | 287.3661  | 323.5450  |
|                          | 6                           | -1.280284000 | -0.930057000 | 0.660661000  |                        |                  | 337.1551                                             | 481.0489  | 558.8430  |
|                          | 6                           | 0.114249000  | -0.778739000 | 1.165559000  |                        |                  | 611.2943                                             | 734.6577  | 851.7521  |
|                          | 1                           | 1.185184000  | -1.667348000 | -0.485200000 |                        |                  | 897.6909                                             | 909.2656  | 950.3606  |
|                          | 1                           | -2.058090000 | -0.014658000 | -1.163378000 |                        |                  | 978.1734                                             | 1012.6951 | 1061.3896 |
|                          | 1                           | -1.386722000 | -1.638299000 | -1.377895000 |                        |                  | 1088.1228                                            | 1146.8706 | 1162.3309 |
|                          | 1                           | -1.380637000 | 1.999231000  | 0.756399000  |                        |                  | 1212.2724                                            | 1231.4379 | 1282.5090 |
|                          | 1                           | -2.119629000 | -1.308582000 | 1.220097000  |                        |                  | 1323.8634                                            | 1361.6206 | 1386.7980 |
|                          | 1                           | 0.237121000  | 0.134678000  | 1.760159000  |                        |                  | 1392.7719                                            | 1427.4972 | 1470.7724 |
|                          | 1                           | 0.449544000  | -1.616377000 | 1.779552000  |                        |                  | 1492.9323                                            | 1501.5473 | 1506.6586 |
|                          | 8                           | -0.665752000 | 2.384713000  | 0.244590000  |                        |                  | 1644.7260                                            | 2974.6894 | 3008.8368 |
|                          | 1                           | -0.392709000 | 1.683691000  | -0.363883000 |                        |                  | 3019.7996                                            | 3066.7165 | 3072.9885 |
|                          | 6                           | 2.134330000  | 0.222504000  | -0.078474000 |                        |                  | 3087.2069                                            | 3141.1722 | 3150.7574 |
|                          | 1                           | 2.855990000  | -0.190690000 | 0.625914000  |                        |                  | 3250.7265                                            | 3747.7638 | 3917.6439 |
|                          | 1                           | 2.607134000  | 0.295072000  | -1.056345000 |                        |                  |                                                      |           |           |
|                          | 1                           | 1.853837000  | 1.221802000  | 0.255791000  |                        |                  |                                                      |           |           |
| PC4<br>(C <sub>1</sub> ) | 6                           | -1.254035000 | 0.598609000  | 0.187576000  | -346.986457            | 0.156228         | 55.8206                                              | 78.0427   | 118.3595  |
|                          | 8                           | -0.624555000 | -0.088401000 | 1.287142000  |                        |                  | 150.2362                                             | 162.2033  | 213.1404  |
|                          | 6                           | 0.186491000  | -1.059249000 | 0.787461000  |                        |                  | 256.0954                                             | 287.9094  | 356.5437  |
|                          | 6                           | -0.096024000 | -1.317884000 | -0.663995000 |                        |                  | 419.2494                                             | 450.1908  | 602.9676  |
|                          | 6                           | -1.361075000 | -0.473858000 | -0.896639000 |                        |                  | 674.2497                                             | 751.3146  | 821.2083  |
|                          | 1                           | -2.226914000 | 0.919923000  | 0.555218000  |                        |                  | 867.3055                                             | 925.5053  | 954.9276  |
|                          | 1                           | 2.165903000  | -0.127209000 | 0.319344000  |                        |                  | 960.1286                                             | 1019.2282 | 1065.6263 |
|                          | 1                           | 0.492602000  | -1.799202000 | 1.512272000  |                        |                  | 1096.6794                                            | 1128.7716 | 1208.9447 |
|                          | 1                           | 0.726366000  | -0.978878000 | -1.300251000 |                        |                  | 1223.0111                                            | 1233.6188 | 1301.4273 |
|                          | 1                           | -0.252447000 | -2.375190000 | -0.875877000 |                        |                  | 1318.9184                                            | 1336.5231 | 1379.2246 |
|                          | 1                           | -1.410556000 | -0.043058000 | -1.894110000 |                        |                  | 1411.2581                                            | 1419.8178 | 1483.6390 |

| Species                  | Cartesian coordinate<br>(Å) |              |              |              | $E_{elec}^0$ (Hartree) | ZPE<br>(Hartree) | Unscaled vibrational frequencies (cm <sup>-1</sup> ) |           |           |
|--------------------------|-----------------------------|--------------|--------------|--------------|------------------------|------------------|------------------------------------------------------|-----------|-----------|
|                          | 1                           | -2.251626000 | -1.079117000 | -0.733045000 |                        |                  | 1495.8179                                            | 1503.8728 | 1506.9323 |
|                          | 8                           | 2.821468000  | 0.245273000  | -0.287088000 |                        |                  | 1621.1235                                            | 3045.8888 | 3061.2299 |
|                          | 1                           | 3.461246000  | 0.693564000  | 0.269475000  |                        |                  | 3090.0651                                            | 3104.2663 | 3110.7548 |
|                          | 6                           | -0.416972000 | 1.794232000  | -0.225586000 |                        |                  | 3138.7854                                            | 3144.3105 | 3148.8376 |
|                          | 1                           | -0.933295000 | 2.359693000  | -1.001346000 |                        |                  | 3214.4441                                            | 3726.1316 | 3931.6845 |
|                          | 1                           | -0.248699000 | 2.449379000  | 0.627776000  |                        |                  |                                                      |           |           |
|                          | 1                           | 0.551809000  | 1.474019000  | -0.612791000 |                        |                  |                                                      |           |           |
| PC5<br>(C <sub>1</sub> ) | 6                           | -1.073970000 | 1.015830000  | -0.655524000 | -346.9746056           | 0.155438         | 50.8957                                              | 76.3996   | 102.7625  |
|                          | 8                           | -0.002992000 | 0.149461000  | -1.054646000 |                        |                  | 127.3467                                             | 181.6808  | 194.7995  |
|                          | 6                           | -0.061456000 | -1.063254000 | -0.298150000 |                        |                  | 213.2700                                             | 324.7327  | 367.1287  |
|                          | 6                           | -0.730410000 | -0.658527000 | 1.012271000  |                        |                  | 452.2359                                             | 556.5691  | 571.3238  |
|                          | 6                           | -1.786569000 | 0.325182000  | 0.513430000  |                        |                  | 572.4944                                             | 671.3330  | 840.5317  |
|                          | 1                           | -0.634455000 | 1.967454000  | -0.354141000 |                        |                  | 869.5353                                             | 900.0461  | 916.3840  |
|                          | 1                           | -1.732808000 | 1.184971000  | -1.507021000 |                        |                  | 947.4557                                             | 1016.3157 | 1067.5325 |
|                          | 1                           | -0.724455000 | -1.766719000 | -0.829912000 |                        |                  | 1086.0701                                            | 1150.6658 | 1175.4174 |
|                          | 1                           | -1.145800000 | -1.508625000 | 1.549458000  |                        |                  | 1210.3892                                            | 1221.9441 | 1271.4168 |
|                          | 1                           | 0.002721000  | -0.153387000 | 1.642516000  |                        |                  | 1304.8938                                            | 1334.2703 | 1346.7581 |
|                          | 1                           | -2.665621000 | -0.214148000 | 0.160483000  |                        |                  | 1380.8342                                            | 1401.8014 | 1453.7341 |
|                          | 1                           | -2.104860000 | 1.034296000  | 1.273395000  |                        |                  | 1485.9434                                            | 1503.6183 | 1537.8231 |
|                          | 6                           | 1.294582000  | -1.644490000 | -0.183455000 |                        |                  | 1649.4414                                            | 2935.8014 | 3071.9220 |
|                          | 1                           | 1.497454000  | -2.373976000 | 0.585705000  |                        |                  | 3082.2445                                            | 3085.7880 | 3113.8955 |
|                          | 1                           | 1.987182000  | -1.544654000 | -1.005434000 |                        |                  | 3142.8193                                            | 3151.1220 | 3175.3949 |
|                          | 1                           | 2.648739000  | 0.939674000  | 0.762847000  |                        |                  | 3283.0619                                            | 3726.6370 | 3925.1182 |
|                          | 8                           | 1.948213000  | 1.540871000  | 0.501444000  |                        |                  |                                                      |           |           |
|                          | 1                           | 1.457070000  | 1.064014000  | -0.183710000 |                        |                  |                                                      |           |           |
| P1<br>(C <sub>1</sub> )  | 6                           | 1.334954000  | -0.843146000 | 0.165267000  | -270.647357            | 0.132088         | 121.8876                                             | 166.1173  | 201.9049  |
|                          | 8                           | -0.046182000 | -1.118467000 | -0.082302000 |                        |                  | 303.7417                                             | 344.0915  | 568.6478  |
|                          | 6                           | -0.734097000 | 0.061667000  | -0.233750000 |                        |                  | 643.6899                                             | 811.3360  | 881.9887  |
|                          | 6                           | 0.147421000  | 1.206897000  | 0.143060000  |                        |                  | 907.7212                                             | 940.7154  | 945.0089  |
|                          | 6                           | 1.532119000  | 0.633394000  | -0.169282000 |                        |                  | 999.2943                                             | 1021.4087 | 1080.6018 |
|                          | 1                           | 1.539500000  | -1.043111000 | 1.219814000  |                        |                  | 1105.0805                                            | 1181.7605 | 1216.8683 |
|                          | 1                           | 1.935258000  | -1.516566000 | -0.443047000 |                        |                  | 1253.4641                                            | 1266.7448 | 1286.8553 |
|                          | 1                           | -0.081813000 | 2.116440000  | -0.409674000 |                        |                  | 1339.1951                                            | 1358.1716 | 1404.7038 |
|                          | 1                           | 0.060050000  | 1.439875000  | 1.215090000  |                        |                  | 1420.1167                                            | 1471.1000 | 1481.3105 |
|                          | 1                           | 1.753034000  | 0.753641000  | -1.229147000 |                        |                  | 1490.1280                                            | 1498.2540 | 1532.2794 |
|                          | 1                           | 2.335117000  | 1.084435000  | 0.408880000  |                        |                  | 2967.7913                                            | 2986.0774 | 3057.3094 |

| Species                        | Cartesian coordinate<br>(Å) |              |              |              | $E_{elec}^{0K}$ (Hartree) | ZPE<br>(Hartree) | Unscaled vibrational frequencies (cm <sup>-1</sup> ) |           |           |
|--------------------------------|-----------------------------|--------------|--------------|--------------|---------------------------|------------------|------------------------------------------------------|-----------|-----------|
|                                | 6                           | -2.189528000 | -0.019475000 | 0.027927000  |                           |                  | 3091.8734                                            | 3096.8885 | 3115.7890 |
|                                | 1                           | -2.685135000 | 0.892785000  | -0.301105000 |                           |                  | 3127.4771                                            | 3143.2398 | 3149.2065 |
|                                | 1                           | -2.630049000 | -0.864784000 | -0.499924000 |                           |                  |                                                      |           |           |
|                                | 1                           | -2.401722000 | -0.151001000 | 1.098203000  |                           |                  |                                                      |           |           |
| <b>P2</b><br>(C <sub>i</sub> ) | 6                           | 1.382993000  | -0.768015000 | 0.054206000  | -270.637339               | 0.130685         | 104.4240                                             | 212.3590  | 216.5447  |
|                                | 8                           | 0.013286000  | -1.102293000 | -0.083605000 |                           |                  | 245.8811                                             | 336.2689  | 478.1201  |
|                                | 6                           | -0.749512000 | -0.009480000 | 0.422560000  |                           |                  | 645.3867                                             | 679.9741  | 859.2057  |
|                                | 6                           | 0.118020000  | 1.182705000  | 0.181273000  |                           |                  | 875.3629                                             | 915.4714  | 949.2307  |
|                                | 6                           | 1.466588000  | 0.731015000  | -0.259396000 |                           |                  | 1003.4201                                            | 1033.8850 | 1047.6688 |
|                                | 1                           | 1.715027000  | -0.957841000 | 1.081563000  |                           |                  | 1087.6246                                            | 1141.9732 | 1160.4611 |
|                                | 1                           | 1.953081000  | -1.397906000 | -0.624358000 |                           |                  | 1200.9384                                            | 1260.8702 | 1298.6571 |
|                                | 1                           | -0.904838000 | -0.159019000 | 1.504198000  |                           |                  | 1306.3833                                            | 1339.1417 | 1370.8757 |
|                                | 1                           | -0.197780000 | 2.203156000  | 0.323301000  |                           |                  | 1400.4149                                            | 1402.8120 | 1474.1036 |
|                                | 1                           | 1.617717000  | 0.893512000  | -1.332678000 |                           |                  | 1487.3754                                            | 1498.1440 | 1522.1108 |
|                                | 1                           | 2.288106000  | 1.225158000  | 0.261850000  |                           |                  | 2940.3398                                            | 3012.9448 | 3022.9613 |
|                                | 6                           | -2.098935000 | 0.019138000  | -0.269291000 |                           |                  | 3066.1775                                            | 3087.0978 | 3137.5455 |
|                                | 1                           | -2.627045000 | -0.918370000 | -0.101529000 |                           |                  | 3143.9143                                            | 3147.7348 | 3250.4266 |
|                                | 1                           | -2.704471000 | 0.836707000  | 0.120930000  |                           |                  |                                                      |           |           |
|                                | 1                           | -1.961013000 | 0.160768000  | -1.340543000 |                           |                  |                                                      |           |           |
| <b>P3</b><br>(C <sub>i</sub> ) | 6                           | 0.685485000  | -0.002761000 | 0.382698000  | -270.637876               | 0.130548         | 154.0155                                             | 168.3260  | 232.7882  |
|                                | 8                           | -0.070411000 | -1.094821000 | -0.130074000 |                           |                  | 243.3125                                             | 323.7279  | 474.3841  |
|                                | 6                           | -1.444671000 | -0.766802000 | -0.001033000 |                           |                  | 605.7555                                             | 737.1681  | 856.2046  |
|                                | 6                           | -1.492719000 | 0.722468000  | -0.066900000 |                           |                  | 900.3003                                             | 911.3974  | 950.1487  |
|                                | 6                           | -0.099610000 | 1.244613000  | -0.045846000 |                           |                  | 973.9215                                             | 1010.7707 | 1058.7671 |
|                                | 1                           | 0.683970000  | -0.058442000 | 1.479792000  |                           |                  | 1093.5186                                            | 1158.2105 | 1161.4399 |
|                                | 1                           | -1.992508000 | -1.266787000 | -0.803295000 |                           |                  | 1206.9527                                            | 1223.2112 | 1279.1273 |
|                                | 1                           | -1.837863000 | -1.146833000 | 0.954696000  |                           |                  | 1326.5367                                            | 1360.3160 | 1387.3128 |
|                                | 1                           | -2.394051000 | 1.307722000  | -0.136422000 |                           |                  | 1393.2885                                            | 1425.7036 | 1471.5743 |
|                                | 1                           | 0.231430000  | 1.569644000  | -1.041112000 |                           |                  | 1487.6314                                            | 1501.5335 | 1506.4583 |
|                                | 1                           | 0.047127000  | 2.084469000  | 0.635426000  |                           |                  | 2962.9325                                            | 2990.7385 | 3003.2899 |
|                                | 6                           | 2.097625000  | -0.094486000 | -0.140284000 |                           |                  | 3064.8510                                            | 3066.7213 | 3086.4103 |
|                                | 1                           | 2.694422000  | 0.736807000  | 0.234920000  |                           |                  | 3140.6146                                            | 3148.5295 | 3255.9163 |
|                                | 1                           | 2.563259000  | -1.026838000 | 0.174446000  |                           |                  |                                                      |           |           |
|                                | 1                           | 2.090848000  | -0.059364000 | -1.229670000 |                           |                  |                                                      |           |           |
| <b>P4</b><br>(C <sub>i</sub> ) | 6                           | -0.767352000 | 0.012106000  | -0.537604000 | -270.645220               | 0.131967         | 159.6434                                             | 172.4504  | 235.8177  |
|                                | 8                           | 0.043983000  | -1.168786000 | -0.447361000 |                           |                  | 355.9184                                             | 440.2502  | 486.5841  |

| Species                        | Cartesian coordinate<br>(Å) |              |              |              | $E_{elec}^0$ (Hartree) | ZPE<br>(Hartree) | Unscaled vibrational frequencies (cm <sup>-1</sup> ) |           |           |
|--------------------------------|-----------------------------|--------------|--------------|--------------|------------------------|------------------|------------------------------------------------------|-----------|-----------|
|                                | 6                           | 1.143130000  | -0.876695000 | 0.306849000  |                        |                  | 675.4260                                             | 748.8208  | 819.0782  |
|                                | 6                           | 1.331036000  | 0.601547000  | 0.455830000  |                        |                  | 871.1651                                             | 923.1115  | 953.6176  |
|                                | 6                           | 0.245498000  | 1.157130000  | -0.482786000 |                        |                  | 955.3720                                             | 1021.8025 | 1063.3647 |
|                                | 1                           | -1.282124000 | -0.044337000 | -1.495291000 |                        |                  | 1083.0153                                            | 1123.9761 | 1201.1017 |
|                                | 1                           | 1.919504000  | -1.623975000 | 0.279351000  |                        |                  | 1217.4747                                            | 1234.1663 | 1295.1741 |
|                                | 1                           | 1.165751000  | 0.930390000  | 1.486189000  |                        |                  | 1314.0603                                            | 1333.3794 | 1376.2977 |
|                                | 1                           | 2.331306000  | 0.932123000  | 0.174575000  |                        |                  | 1408.6320                                            | 1414.1266 | 1482.6854 |
|                                | 1                           | -0.199863000 | 2.083707000  | -0.126731000 |                        |                  | 1490.7289                                            | 1500.5522 | 1506.7760 |
|                                | 1                           | 0.661135000  | 1.329625000  | -1.474516000 |                        |                  | 3032.7366                                            | 3063.4500 | 3085.6838 |
|                                | 6                           | -1.768504000 | 0.039932000  | 0.602725000  |                        |                  | 3095.6016                                            | 3109.2484 | 3138.2903 |
|                                | 1                           | -2.428824000 | 0.901681000  | 0.506166000  |                        |                  | 3144.5980                                            | 3150.0843 | 3242.5913 |
|                                | 1                           | -2.371664000 | -0.866182000 | 0.598486000  |                        |                  |                                                      |           |           |
|                                | 1                           | -1.249938000 | 0.103133000  | 1.560577000  |                        |                  |                                                      |           |           |
| <b>P5</b><br>(C <sub>1</sub> ) | 6                           | -1.315400000 | -0.818387000 | -0.165841000 | -270.630852            | 0.130600         | 68.5373                                              | 131.1941  | 215.5910  |
|                                | 8                           | 0.047621000  | -1.136624000 | 0.101934000  |                        |                  | 308.2708                                             | 440.4125  | 488.1806  |
|                                | 6                           | 0.791955000  | 0.047223000  | 0.388868000  |                        |                  | 565.6626                                             | 658.9658  | 834.3397  |
|                                | 6                           | -0.057792000 | 1.185099000  | -0.199858000 |                        |                  | 877.5707                                             | 898.2565  | 922.3909  |
|                                | 6                           | -1.467903000 | 0.680748000  | 0.087654000  |                        |                  | 950.5479                                             | 1008.5385 | 1061.1284 |
|                                | 1                           | -1.533736000 | -1.066762000 | -1.207491000 |                        |                  | 1107.3448                                            | 1156.1067 | 1159.0846 |
|                                | 1                           | -1.956034000 | -1.424455000 | 0.475013000  |                        |                  | 1196.7120                                            | 1211.4547 | 1266.4048 |
|                                | 1                           | 0.842813000  | 0.182073000  | 1.477889000  |                        |                  | 1298.5701                                            | 1336.8646 | 1340.1017 |
|                                | 1                           | 0.172162000  | 2.147965000  | 0.250611000  |                        |                  | 1378.5615                                            | 1399.5093 | 1456.8866 |
|                                | 1                           | 0.121415000  | 1.247443000  | -1.274694000 |                        |                  | 1485.9812                                            | 1500.6016 | 1540.2284 |
|                                | 1                           | -1.726288000 | 0.867436000  | 1.130491000  |                        |                  | 2992.3784                                            | 3051.4743 | 3074.9910 |
|                                | 1                           | -2.231030000 | 1.134098000  | -0.541185000 |                        |                  | 3081.4356                                            | 3102.8478 | 3139.8862 |
|                                | 6                           | 2.156854000  | -0.070497000 | -0.163565000 |                        |                  | 3147.8200                                            | 3180.0698 | 3291.6781 |
|                                | 1                           | 2.975661000  | 0.481970000  | 0.269187000  |                        |                  |                                                      |           |           |
|                                | 1                           | 2.307791000  | -0.621884000 | -1.078839000 |                        |                  |                                                      |           |           |

Frequencies in the parentheses (“( )”) are taken from experimental studies.

**Table S2:** T1 diagnostics for the species involved in 2MTHF + OH reaction calculated at CCSD(T)/cc-pVTZ based on the M06-2X/aug-cc-pVTZ geometries.

| No. | Species          | T1 diagnostics |
|-----|------------------|----------------|
| 1   | 2MTHF            | 0.00988196     |
| 2   | OH               | 0.00704816     |
| 3   | <b>RC</b>        | 0.01033272     |
| 4   | <b>TS1</b>       | 0.01689595     |
| 5   | <b>TS2a</b>      | 0.01639799     |
| 6   | <b>TS2b</b>      | 0.01606206     |
| 7   | <b>TS3a</b>      | 0.01620179     |
| 8   | <b>TS3b</b>      | 0.01609799     |
| 9   | <b>TS4a</b>      | 0.01691631     |
| 10  | <b>TS4b</b>      | 0.01695069     |
| 11  | <b>TS5</b>       | 0.01588828     |
| 12  | <b>PC1</b>       | 0.01278459     |
| 13  | <b>PC2</b>       | 0.01143563     |
| 14  | <b>PC3</b>       | 0.01129848     |
| 15  | <b>PC4</b>       | 0.01326695     |
| 16  | <b>PC5</b>       | 0.01080681     |
| 17  | <b>P1</b>        | 0.01358125     |
| 18  | <b>P2</b>        | 0.01164737     |
| 19  | <b>P3</b>        | 0.01147930     |
| 20  | <b>P4</b>        | 0.01354334     |
| 21  | <b>P5</b>        | 0.01132015     |
| 22  | H <sub>2</sub> O | 0.00651823     |

**Table S3:** Calculated global rate constants,  $k_{\text{tot}}$ , of the 2MTHF + OH  $\rightarrow$  products over the range of temperature 200 – 2000 K at different pressures, including the HIR treatments and Eckart quantum tunneling effects. Units are in cm<sup>3</sup>/molecule/s. The  $k_{\text{tot}}(T, P)$  at different pressures are fitted as the double-modified Arrhenius formats.

| <b>T (K)</b> | <b>0.76 Torr</b> | <b>7.6 Torr</b> | <b>76 Torr</b>  | <b>760 Torr</b> | <b>7600 Torr</b> |
|--------------|------------------|-----------------|-----------------|-----------------|------------------|
| 200          | 8.18E-11         | 8.18E-11        | 8.25E-11        | 8.83E-11        | 1.25E-10         |
| 240          | 4.81E-11         | 4.81E-11        | 4.84E-11        | 5.04E-11        | 6.40E-11         |
| <b>298</b>   | <b>2.36E-11</b>  | <b>2.35E-11</b> | <b>2.36E-11</b> | <b>2.41E-11</b> | <b>2.72E-11</b>  |
| 300          | 2.31E-11         | 2.30E-11        | 2.31E-11        | 2.35E-11        | 2.64E-11         |
| 400          | 8.68E-12         | 8.68E-12        | 8.68E-12        | 8.73E-12        | 9.00E-12         |
| 440          | 6.45E-12         | 6.46E-12        | 6.44E-12        | 6.47E-12        | 6.60E-12         |
| 500          | 4.57E-12         | 4.57E-12        | 4.58E-12        | 4.58E-12        | 4.63E-12         |
| 600          | 3.43E-12         | 3.44E-12        | 3.44E-12        | 3.44E-12        | 3.45E-12         |
| 700          | 3.40E-12         | 3.40E-12        | 3.40E-12        | 3.39E-12        | 3.40E-12         |
| 800          | 3.93E-12         | 3.94E-12        | 3.94E-12        | 3.94E-12        | 3.93E-12         |
| 900          | 4.89E-12         | 4.90E-12        | 4.90E-12        | 4.89E-12        | 4.89E-12         |
| 1000         | 6.23E-12         | 6.23E-12        | 6.23E-12        | 6.24E-12        | 6.23E-12         |
| 1100         | 7.94E-12         | 7.93E-12        | 7.93E-12        | 7.95E-12        | 7.94E-12         |
| 1200         | 1.00E-11         | 1.00E-11        | 1.00E-11        | 1.00E-11        | 1.00E-11         |
| 1300         | 1.25E-11         | 1.25E-11        | 1.25E-11        | 1.25E-11        | 1.25E-11         |
| 1400         | 1.54E-11         | 1.54E-11        | 1.54E-11        | 1.54E-11        | 1.54E-11         |
| 1500         | 1.87E-11         | 1.88E-11        | 1.88E-11        | 1.87E-11        | 1.87E-11         |
| 1600         | 2.26E-11         | 2.26E-11        | 2.25E-11        | 2.26E-11        | 2.26E-11         |
| 1700         | 2.69E-11         | 2.69E-11        | 2.69E-11        | 2.69E-11        | 2.69E-11         |
| 1800         | 3.17E-11         | 3.17E-11        | 3.17E-11        | 3.17E-11        | 3.17E-11         |
| 1900         | 3.70E-11         | 3.70E-11        | 3.70E-11        | 3.70E-11        | 3.70E-11         |
| 2000         | 4.29E-11         | 4.29E-11        | 4.29E-11        | 4.29E-11        | 4.29E-11         |

- $k(T) = 1.26 \times 10^2 \times T^{4.90} \times \exp[-418.0 \text{ K}/T] + 7.10 \times 10^{-23} \times T^{3.51} \times \exp[945.2 \text{ K}/T]$   
(cm<sup>3</sup>/molecule/s) ( $T = 200 - 2000 \text{ K}$  &  $P = \mathbf{0.76 \text{ Torr}}$ ; error = 0.7 %).
- $k(T) = 9.72 \times 10^1 \times T^{4.87} \times \exp[-406.6 \text{ K}/T] + 7.09 \times 10^{-23} \times T^{3.51} \times \exp[945.2 \text{ K}/T]$   
(cm<sup>3</sup>/molecule/s) ( $T = 200 - 2000 \text{ K}$  &  $P = \mathbf{7.6 \text{ Torr}}$ ; error = 0.7 %).
- $k(T) = 9.45 \times 10^1 \times T^{4.86} \times \exp[-402.2 \text{ K}/T] + 6.88 \times 10^{-23} \times T^{3.51} \times \exp[950.7 \text{ K}/T]$   
(cm<sup>3</sup>/molecule/s) ( $T = 200 - 2000 \text{ K}$  &  $P = \mathbf{76 \text{ Torr}}$ ; error = 0.7 %).
- $k(T) = 3.55 \times 10^1 \times T^{4.72} \times \exp[-340.0 \text{ K}/T] + 8.21 \times 10^{-23} \times T^{3.49} \times \exp[918.8 \text{ K}/T]$   
(cm<sup>3</sup>/molecule/s) ( $T = 200 - 2000 \text{ K}$  &  $P = \mathbf{760 \text{ Torr}}$ ; error = 0.7 %).
- $k(T) = 1.96 \times T^{4.33} \times \exp[-104.5 \text{ K}/T] + 6.95 \times 10^{-23} \times T^{3.51} \times \exp[941.9 \text{ K}/T]$   
(cm<sup>3</sup>/molecule/s) ( $T = 200 - 2000 \text{ K}$  &  $P = \mathbf{7600 \text{ Torr}}$ ; error = 1.1 %).

**Table S4:** The calculated Eckart tunneling factor via tight transition state channels over the wide range of temperature 200 – 2000 K.

| T (K)      | via TS1     | via TS2a    | via TS2b    | via TS3a    | via TS3b    | via TS4a    | via TS4b    | via TS5     |
|------------|-------------|-------------|-------------|-------------|-------------|-------------|-------------|-------------|
| 200        | 2.44        | 13.20       | 16.00       | 13.40       | 13.30       | 3.66        | 3.53        | 28.90       |
| 250        | 1.75        | 4.63        | 5.05        | 4.62        | 4.57        | 2.20        | 2.17        | 7.35        |
| <b>300</b> | <b>1.47</b> | <b>2.79</b> | <b>2.93</b> | <b>2.78</b> | <b>2.75</b> | <b>1.71</b> | <b>1.70</b> | <b>3.78</b> |
| 400        | 1.25        | 1.76        | 1.80        | 1.75        | 1.74        | 1.35        | 1.35        | 2.07        |
| 500        | 1.15        | 1.44        | 1.45        | 1.43        | 1.43        | 1.21        | 1.21        | 1.59        |
| 600        | 1.11        | 1.29        | 1.30        | 1.29        | 1.28        | 1.15        | 1.14        | 1.39        |
| 700        | 1.08        | 1.21        | 1.22        | 1.21        | 1.20        | 1.11        | 1.11        | 1.28        |
| 800        | 1.06        | 1.16        | 1.16        | 1.16        | 1.15        | 1.08        | 1.08        | 1.21        |
| 900        | 1.05        | 1.13        | 1.13        | 1.12        | 1.12        | 1.06        | 1.06        | 1.17        |
| 1000       | 1.04        | 1.10        | 1.10        | 1.10        | 1.10        | 1.05        | 1.05        | 1.13        |
| 1100       | 1.03        | 1.08        | 1.09        | 1.08        | 1.08        | 1.04        | 1.04        | 1.11        |
| 1200       | 1.03        | 1.07        | 1.07        | 1.07        | 1.07        | 1.04        | 1.04        | 1.09        |
| 1300       | 1.02        | 1.06        | 1.06        | 1.06        | 1.06        | 1.03        | 1.03        | 1.08        |
| 1400       | 1.02        | 1.05        | 1.06        | 1.05        | 1.05        | 1.03        | 1.03        | 1.07        |
| 1500       | 1.02        | 1.05        | 1.05        | 1.05        | 1.05        | 1.02        | 1.02        | 1.06        |
| 1600       | 1.02        | 1.04        | 1.04        | 1.04        | 1.04        | 1.02        | 1.02        | 1.06        |
| 1700       | 1.01        | 1.04        | 1.04        | 1.04        | 1.04        | 1.02        | 1.02        | 1.05        |
| 1800       | 1.01        | 1.03        | 1.03        | 1.03        | 1.03        | 1.02        | 1.02        | 1.05        |
| 1900       | 1.01        | 1.03        | 1.03        | 1.03        | 1.03        | 1.02        | 1.02        | 1.04        |
| 2000       | 1.01        | 1.03        | 1.03        | 1.03        | 1.03        | 1.01        | 1.01        | 1.04        |

**Table S5:** Calculated overall rate constants,  $k_{\text{tot}}$ , of the 2MTHF + OH  $\rightarrow$  products over the range of temperature 200 – 2000 K at  $P = 760$  Torr with and without HIR treatments based on M06-2X/aug-cc-pVTZ level of theory. Units are in  $\text{cm}^3/\text{molecule/s}$ .

| T (K) | 2MTHF + OH $\rightarrow$ products ( $k_{\text{tot}}$ ) |             | HIR factor |
|-------|--------------------------------------------------------|-------------|------------|
|       | With HIR                                               | Without HIR |            |
| 200   | 8.83E-11                                               | 8.09E-11    | 1.09       |
| 240   | 5.04E-11                                               | 4.74E-11    | 1.06       |
| 298   | 2.41E-11                                               | 2.36E-11    | 1.02       |
| 300   | 2.35E-11                                               | 2.31E-11    | 1.02       |
| 400   | 8.73E-12                                               | 8.89E-12    | 0.98       |
| 440   | 6.47E-12                                               | 6.56E-12    | 0.98       |
| 500   | 4.58E-12                                               | 4.56E-12    | 1.01       |
| 600   | 3.44E-12                                               | 3.10E-12    | 1.11       |
| 700   | 3.39E-12                                               | 2.69E-12    | 1.26       |
| 800   | 3.94E-12                                               | 2.75E-12    | 1.43       |
| 900   | 4.89E-12                                               | 3.07E-12    | 1.59       |
| 1000  | 6.24E-12                                               | 3.60E-12    | 1.73       |
| 1100  | 7.95E-12                                               | 4.25E-12    | 1.87       |
| 1200  | 1.00E-11                                               | 5.04E-12    | 1.99       |
| 1300  | 1.25E-11                                               | 5.96E-12    | 2.09       |
| 1400  | 1.54E-11                                               | 7.02E-12    | 2.19       |
| 1500  | 1.87E-11                                               | 8.20E-12    | 2.29       |
| 1600  | 2.26E-11                                               | 9.51E-12    | 2.38       |
| 1700  | 2.69E-11                                               | 1.10E-11    | 2.45       |
| 1800  | 3.17E-11                                               | 1.25E-11    | 2.53       |
| 1900  | 3.70E-11                                               | 1.43E-11    | 2.59       |
| 2000  | 4.29E-11                                               | 1.62E-11    | 2.65       |



**Table S6:** Calculated NASA coefficients for the thermodynamic properties of various species in the reaction of OH radicals with 2MTHF.

|                 |                 |                 |                 |                 |          |   |  |
|-----------------|-----------------|-----------------|-----------------|-----------------|----------|---|--|
| oh              | O 1H 1          | G               | 300.000         | 2500.000        | 1500.000 | 1 |  |
| 2.81225291E+00  | 1.01512616E-03  | -1.89644406E-07 | -9.64170707E-12 | 4.87966516E-15  | 2        |   |  |
| 1.00522902E+04  | 5.41837124E+00  | 3.87657025E+00  | -1.35782277E-03 | 1.62653697E-06  | 3        |   |  |
| -5.14676941E-10 | 2.70765002E-14  | 9.82537593E+03  | -3.08896856E-01 |                 | 4        |   |  |
| 2mthf           | C 5O 1H 10      | G               | 300.000         | 2500.000        | 1500.000 | 1 |  |
| 5.85692741E+00  | 4.41809893E-02  | -2.18955532E-05 | 5.30616329E-09  | -5.11618235E-13 | 2        |   |  |
| -4.29778615E+02 | -7.18572649E+00 | -5.32334471E+00 | 7.48293718E-02  | -5.34263436E-05 | 3        |   |  |
| 1.96151761E-08  | -2.90724173E-12 | 1.79282047E+03  | 5.10119692E+01  |                 | 4        |   |  |
| rc              | C 5O 2H 11      | G               | 300.000         | 2500.000        | 1500.000 | 1 |  |
| 9.57799001E+00  | 4.62466778E-02  | -2.27787813E-05 | 5.50217856E-09  | -5.29830420E-13 | 2        |   |  |
| 5.94836194E+03  | -2.23620055E+01 | -3.26848549E+00 | 8.48445749E-02  | -6.70696345E-05 | 3        |   |  |
| 2.83542108E-08  | -4.97806827E-12 | 8.41122924E+03  | 4.34389779E+01  |                 | 4        |   |  |
| ts1             | C 5O 2H 11      | G               | 300.000         | 2500.000        | 1500.000 | 1 |  |
| 1.00414623E+01  | 4.38608910E-02  | -2.15052191E-05 | 5.17287769E-09  | -4.96252940E-13 | 2        |   |  |
| 7.65367684E+03  | -2.38089817E+01 | -1.86505089E+00 | 8.06160241E-02  | -6.53751191E-05 | 3        |   |  |
| 2.89286779E-08  | -5.37600588E-12 | 9.91289820E+03  | 3.69379151E+01  |                 | 4        |   |  |
| ts2a            | C 5O 2H 11      | G               | 300.000         | 2500.000        | 1500.000 | 1 |  |
| 1.17135608E+01  | 4.18797009E-02  | -2.04973456E-05 | 4.92746513E-09  | -4.72784916E-13 | 2        |   |  |
| 8.23614575E+03  | -3.53640690E+01 | -7.31035953E+00 | 1.06655779E-01  | -1.04569447E-04 | 3        |   |  |
| 5.36806773E-08  | -1.10503996E-11 | 1.16804527E+04  | 5.97200070E+01  |                 | 4        |   |  |
| ts2b            | C 5O 2H 11      | G               | 300.000         | 2500.000        | 1500.000 | 1 |  |
| 1.08265110E+01  | 4.30460851E-02  | -2.11411052E-05 | 5.09496161E-09  | -4.89690764E-13 | 2        |   |  |
| 8.90527456E+03  | -2.98446013E+01 | -4.79695061E+00 | 9.54178878E-02  | -8.85930816E-05 | 3        |   |  |
| 4.41383775E-08  | -8.97689929E-12 | 1.17584299E+04  | 4.85575593E+01  |                 | 4        |   |  |
| ts3a            | C 5O 2H 11      | G               | 300.000         | 2500.000        | 1500.000 | 1 |  |
| 1.22393665E+01  | 4.13254108E-02  | -2.02534397E-05 | 4.87870505E-09  | -4.69292773E-13 | 2        |   |  |
| 8.16849756E+03  | -3.88811058E+01 | -9.63970469E+00 | 1.17750769E-01  | -1.21438116E-04 | 3        |   |  |
| 6.44510116E-08  | -1.35436270E-11 | 1.20772802E+04  | 6.98497365E+01  |                 | 4        |   |  |
| ts3b            | C 5O 2H 11      | G               | 300.000         | 2500.000        | 1500.000 | 1 |  |
| 1.11827987E+01  | 4.27119788E-02  | -2.10230556E-05 | 5.08161754E-09  | -4.90208334E-13 | 2        |   |  |
| 8.66569535E+03  | -3.20079622E+01 | -6.03084235E+00 | 1.01115289E-01  | -9.69046568E-05 | 3        |   |  |
| 4.92647566E-08  | -1.01310846E-11 | 1.17897438E+04  | 5.41376125E+01  |                 | 4        |   |  |
| ts4a            | C 5O 2H 11      | G               | 300.000         | 2500.000        | 1500.000 | 1 |  |
| 1.19400103E+01  | 4.13257395E-02  | -2.00950249E-05 | 4.80314875E-09  | -4.58513051E-13 | 2        |   |  |
| 8.06380871E+03  | -3.55810944E+01 | -8.66771071E+00 | 1.14297461E-01  | -1.17910856E-04 | 3        |   |  |
| 6.30085209E-08  | -1.33471623E-11 | 1.17198919E+04  | 6.65454136E+01  |                 | 4        |   |  |
| ts4b            | C 5O 2H 11      | G               | 300.000         | 2500.000        | 1500.000 | 1 |  |
| 1.19472530E+01  | 4.10669436E-02  | -1.98227497E-05 | 4.69919320E-09  | -4.44664645E-13 | 2        |   |  |
| 7.79395650E+03  | -3.46196556E+01 | -7.98806237E+00 | 1.10945416E-01  | -1.12830713E-04 | 3        |   |  |
| 5.97692322E-08  | -1.25955480E-11 | 1.13504177E+04  | 6.44138918E+01  |                 | 4        |   |  |
| ts5             | C 5O 2H 11      | G               | 300.000         | 2500.000        | 1500.000 | 1 |  |
| 1.46212973E+01  | 3.90760541E-02  | -1.93579160E-05 | 4.71192219E-09  | -4.57539961E-13 | 2        |   |  |
| 7.76052906E+03  | -5.08187094E+01 | -8.82829571E+00 | 1.13707780E-01  | -1.09620515E-04 | 3        |   |  |
| 5.35625572E-08  | -1.03903071E-11 | 1.21404929E+04  | 6.78860018E+01  |                 | 4        |   |  |
| h2o             | O 1H 2          | G               | 300.000         | 2500.000        | 1500.000 | 1 |  |
| 2.70866693E+00  | 2.80814120E-03  | -6.60397292E-07 | 2.52067241E-11  | 7.65581616E-15  | 2        |   |  |
| -2.18707796E+04 | 6.82309834E+00  | 3.90272527E+00  | -1.28732210E-04 | 2.12200121E-06  | 3        |   |  |
| -1.19806012E-09 | 2.21181709E-13  | -2.21185189E+04 | 4.71734744E-01  |                 | 4        |   |  |
| p1              | C 5O 1H 9       | G               | 300.000         | 2500.000        | 1500.000 | 1 |  |
| 6.07488745E+00  | 4.07653578E-02  | -2.02703522E-05 | 4.92596931E-09  | -4.76134731E-13 | 2        |   |  |
| 1.97540750E+04  | -7.64021805E+00 | -3.40116380E+00 | 6.50338362E-02  | -4.28424077E-05 | 3        |   |  |
| 1.36977798E-08  | -1.60712170E-12 | 2.16833231E+04  | 4.22140898E+01  |                 | 4        |   |  |
| p2              | C 5O 1H 9       | G               | 300.000         | 2500.000        | 1500.000 | 1 |  |
| 7.50678898E+00  | 3.88356570E-02  | -1.91618215E-05 | 4.62253240E-09  | -4.43637840E-13 | 2        |   |  |

|                                                                            |   |
|----------------------------------------------------------------------------|---|
| 2.21875117E+04-1.44322742E+01-3.92482521E+00 7.20219153E-02-5.59491458E-05 | 3 |
| 2.29637838E-08-3.89516367E-12 2.44112190E+04 4.45106214E+01                | 4 |
| <b>p3</b> C 5O 1H 9 G 300.000 2500.000 1500.000 1                          |   |
| 7.45046138E+00 3.89871505E-02-1.92744159E-05 4.65768871E-09-4.47688549E-13 | 2 |
| 2.19785530E+04-1.43383598E+01-3.86812704E+00 7.16322052E-02-5.51926832E-05 | 3 |
| 2.24173737E-08-3.75958317E-12 2.41860218E+04 4.40895974E+01                | 4 |
| <b>p4</b> C 5O 1H 9 G 300.000 2500.000 1500.000 1                          |   |
| 7.46658449E+00 3.87003545E-02-1.90262125E-05 4.57719405E-09-4.38389747E-13 | 2 |
| 2.00076259E+04-1.52255310E+01-4.87841294E+00 7.55520807E-02-6.11960794E-05 | 3 |
| 2.63427798E-08-4.68696185E-12 2.23819033E+04 4.81107463E+01                | 4 |
| <b>p5</b> C 5O 1H 9 G 300.000 2500.000 1500.000 1                          |   |
| 6.73328675E+00 3.98423519E-02-1.97747054E-05 4.80609934E-09-4.65215693E-13 | 2 |
| 2.43898191E+04-9.50539558E+00-4.29091146E+00 7.15620160E-02-5.43974295E-05 | 3 |
| 2.16968888E-08-3.55713544E-12 2.65408133E+04 4.73992653E+01                | 4 |

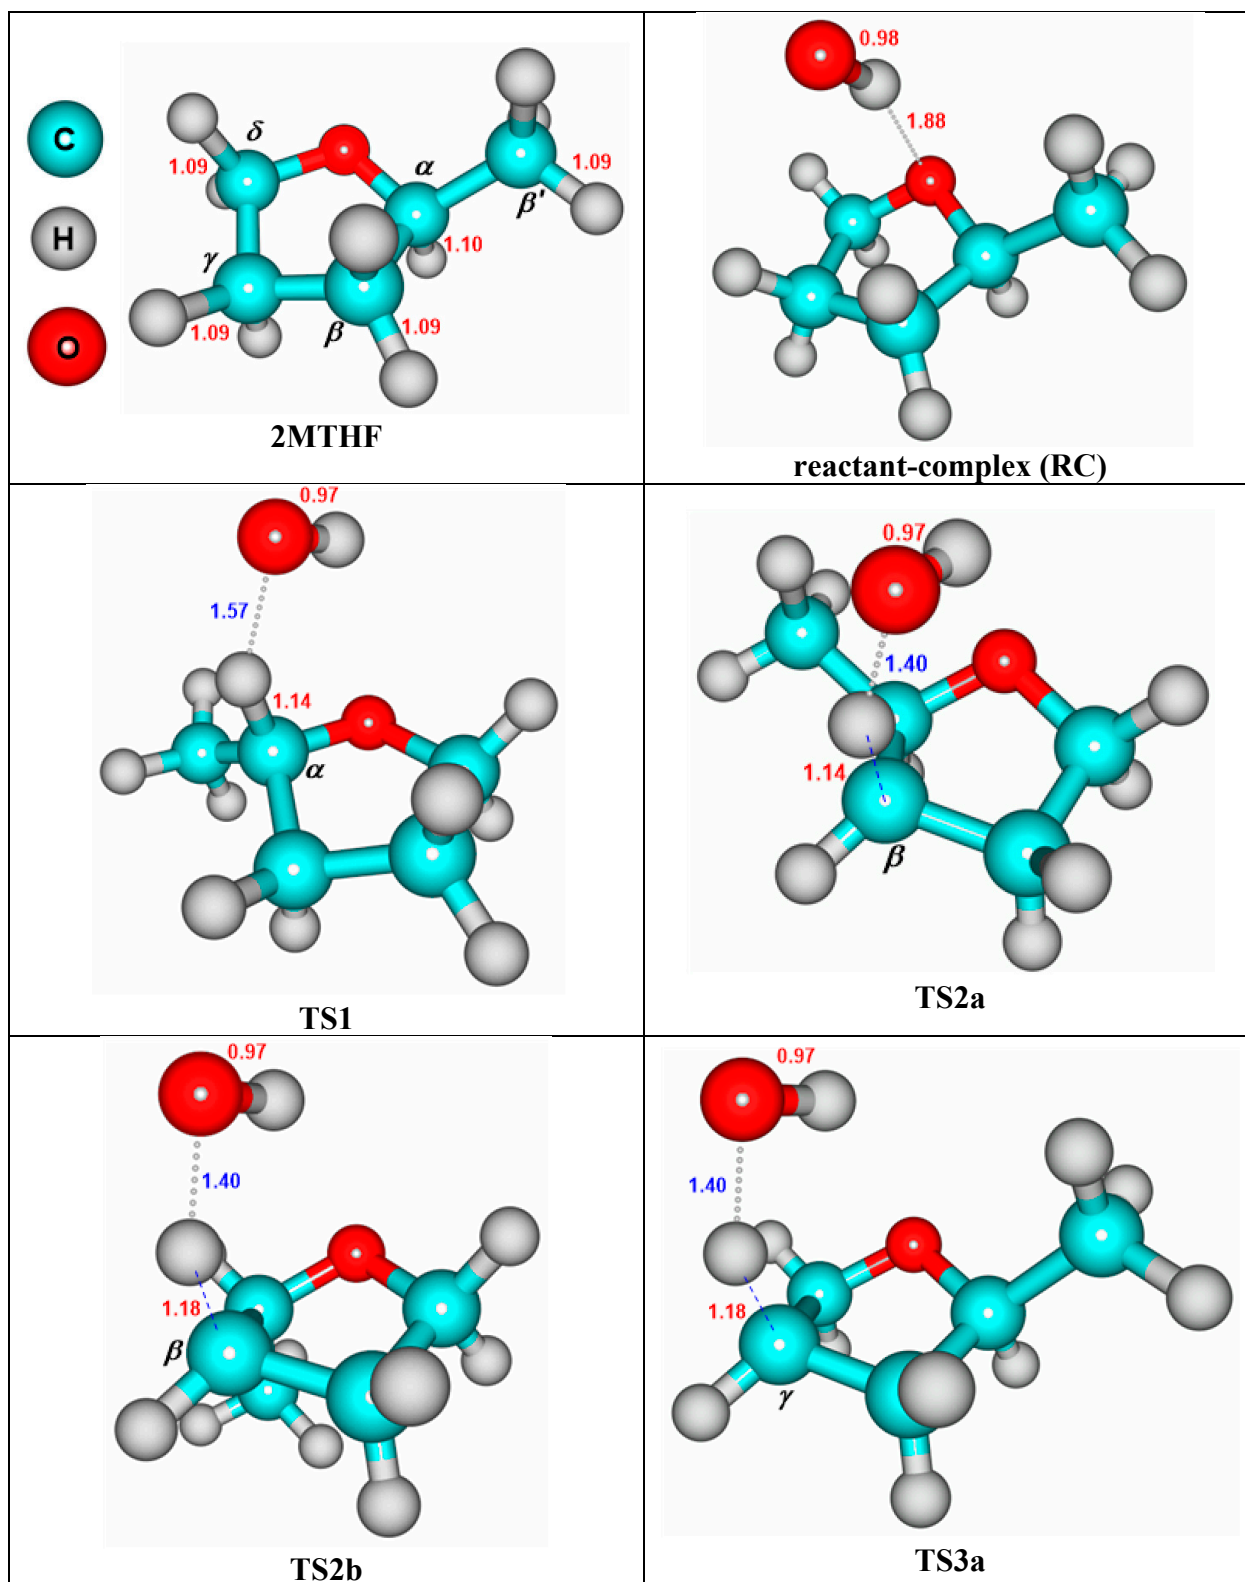

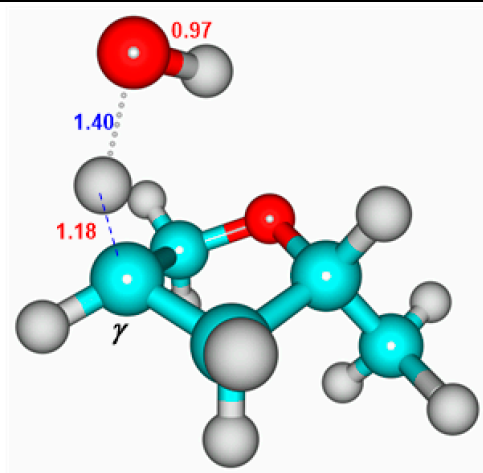

TS3b

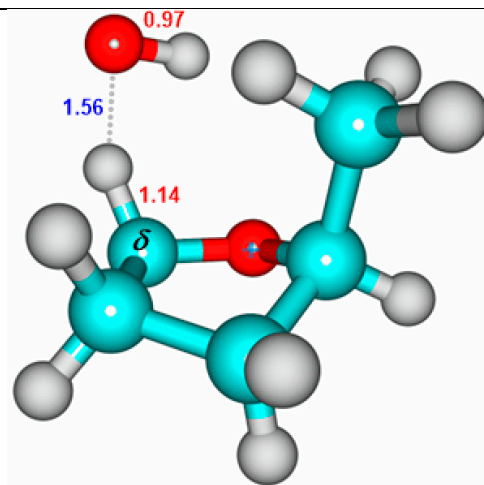

TS4a

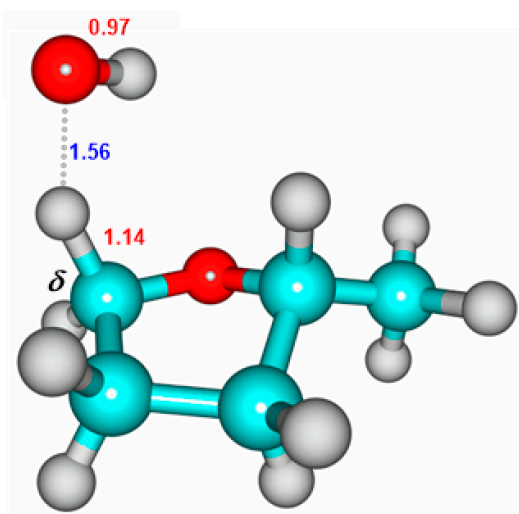

TS4b

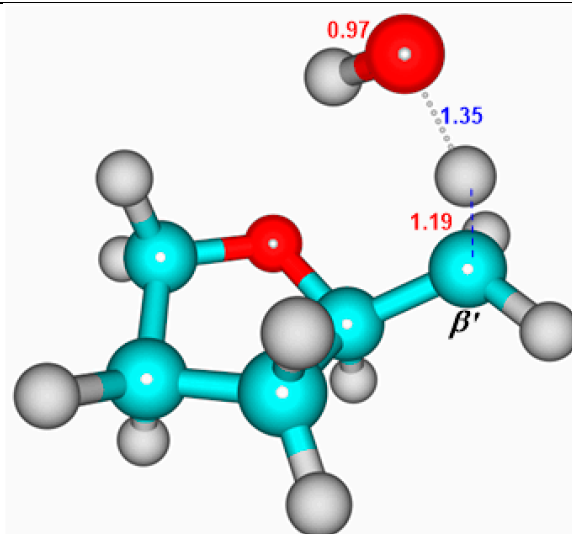

TS5

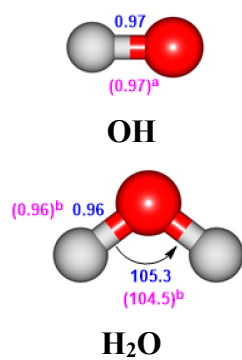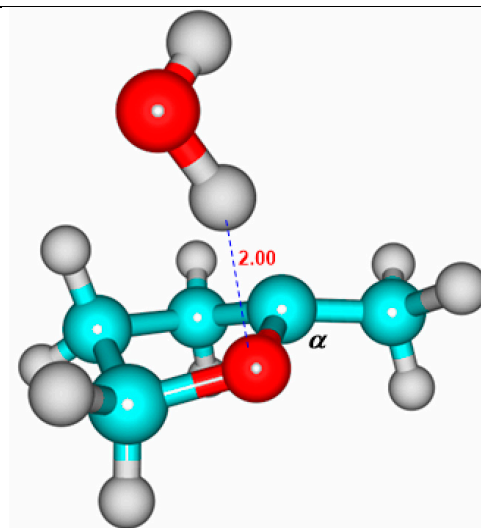

PC1

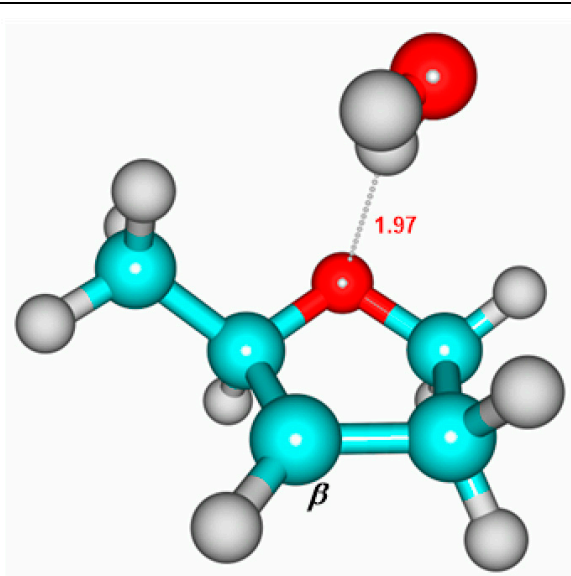

PC2

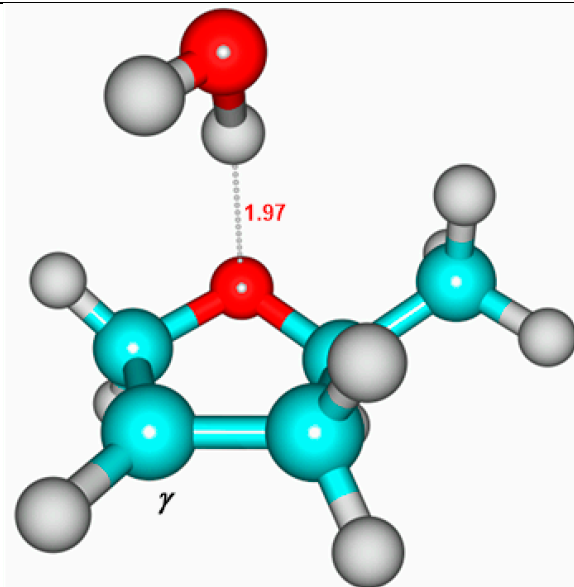

PC3

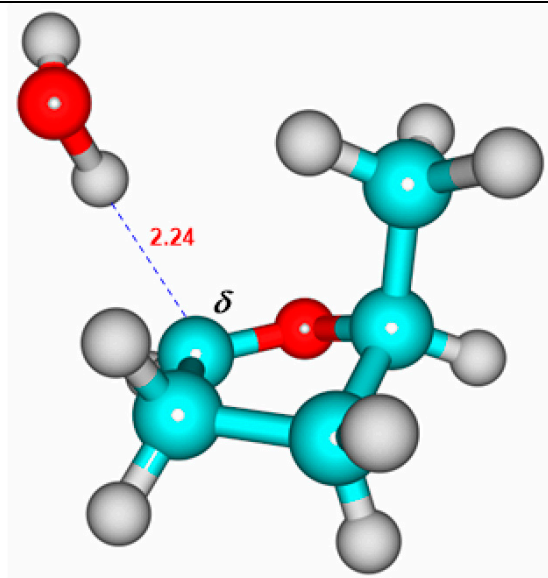

PC4

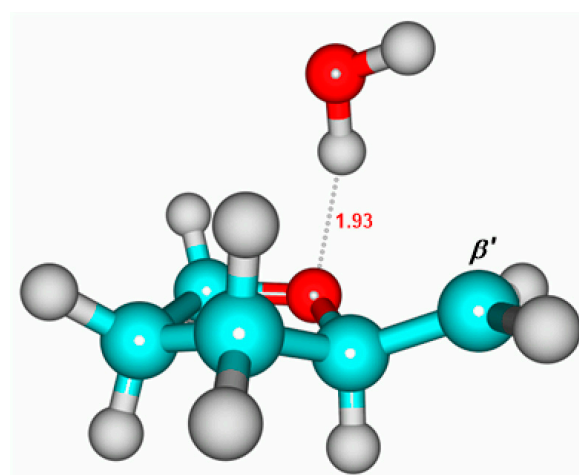

PC5

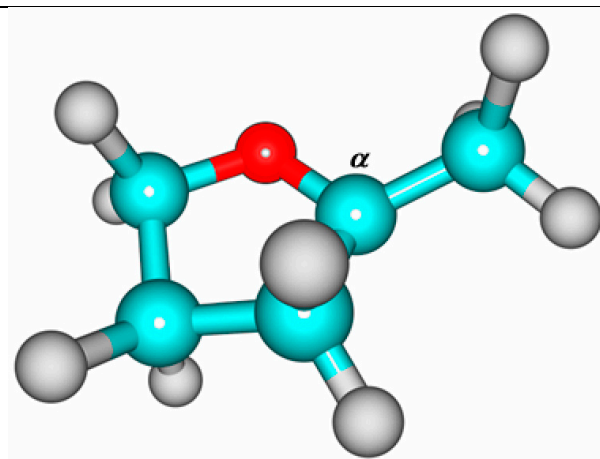

P1

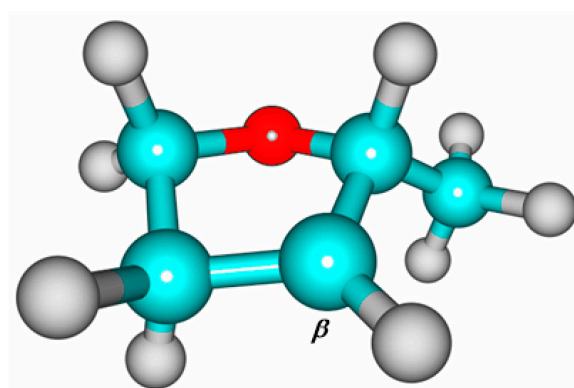

P2

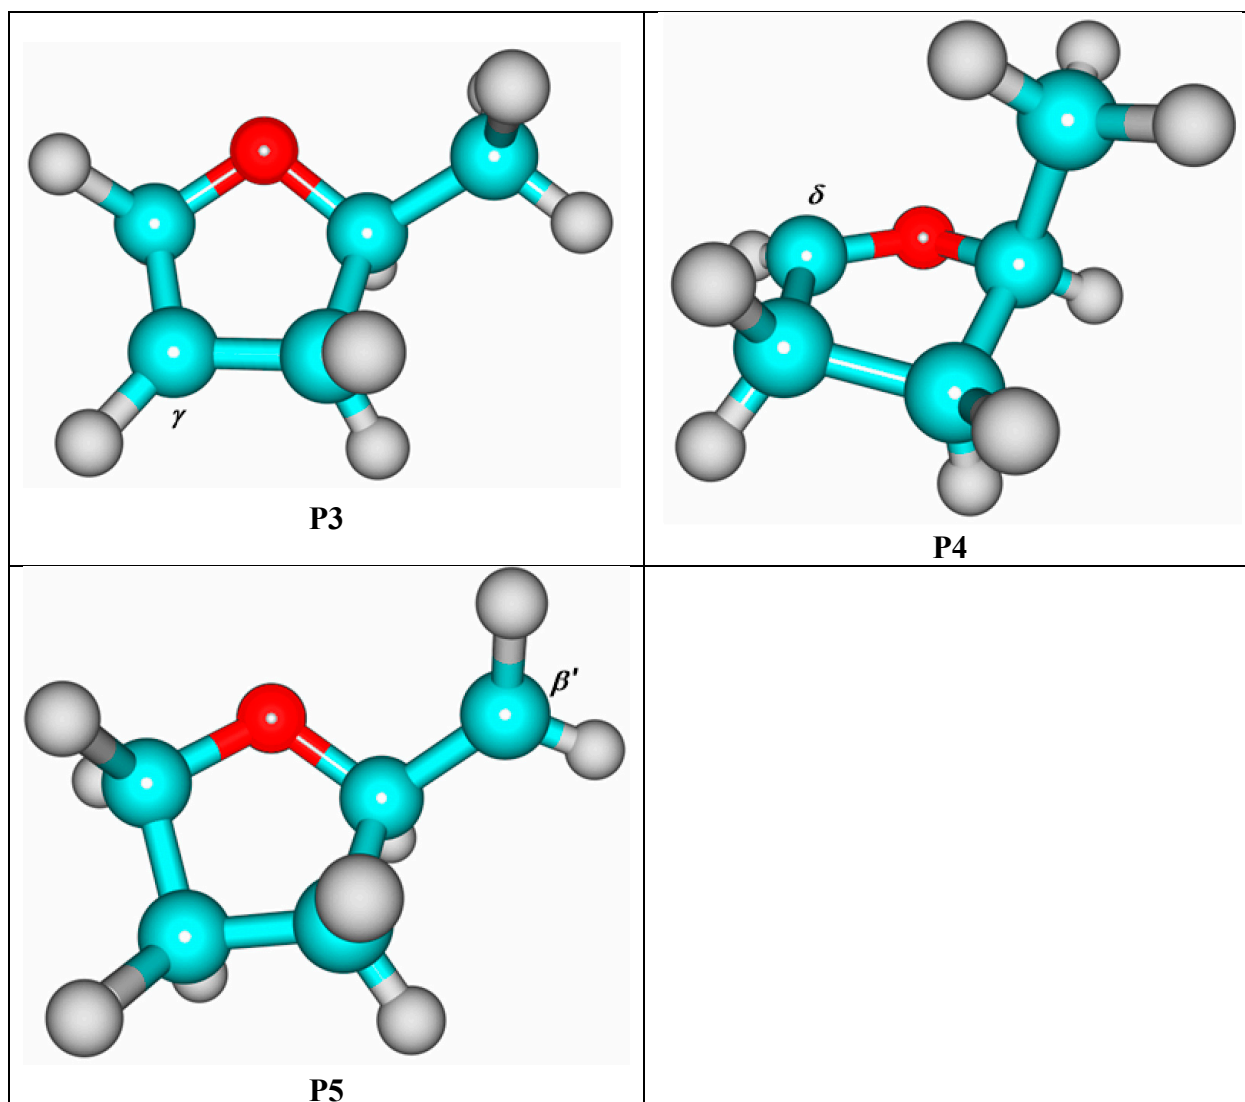

**Figure S1:** M06-2X/aug-cc-pVTZ optimized geometries for the species involved in the title reaction. All structures were obtained for the lowest-energy conformer of a given species. Bond lengths and bond angles are in Å and degree (°), respectively. <sup>a</sup>, <sup>b</sup> are taken from the experimental data[1, 3], respectively.

## Species

## Potential energy surfaces for the internal rotations

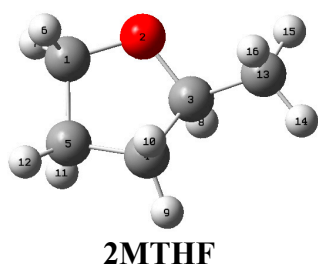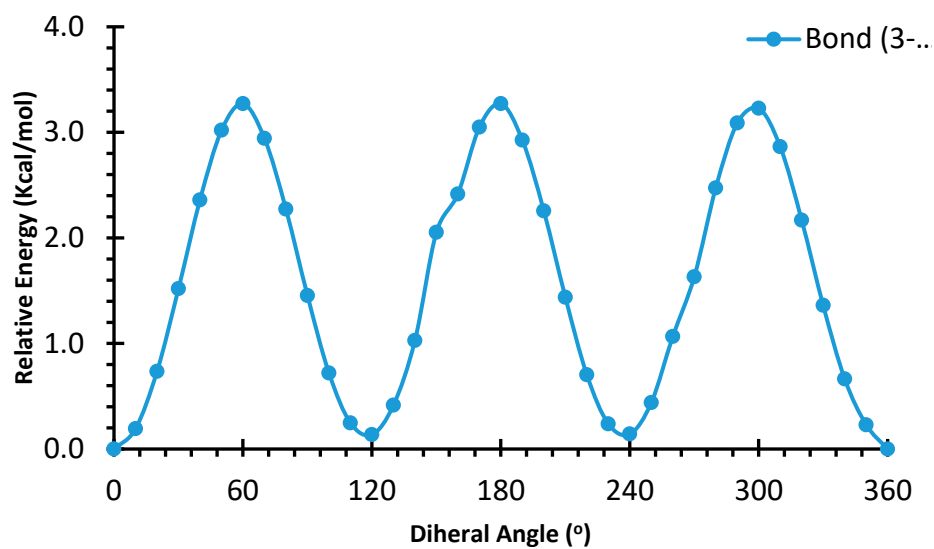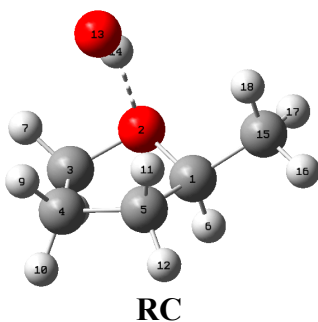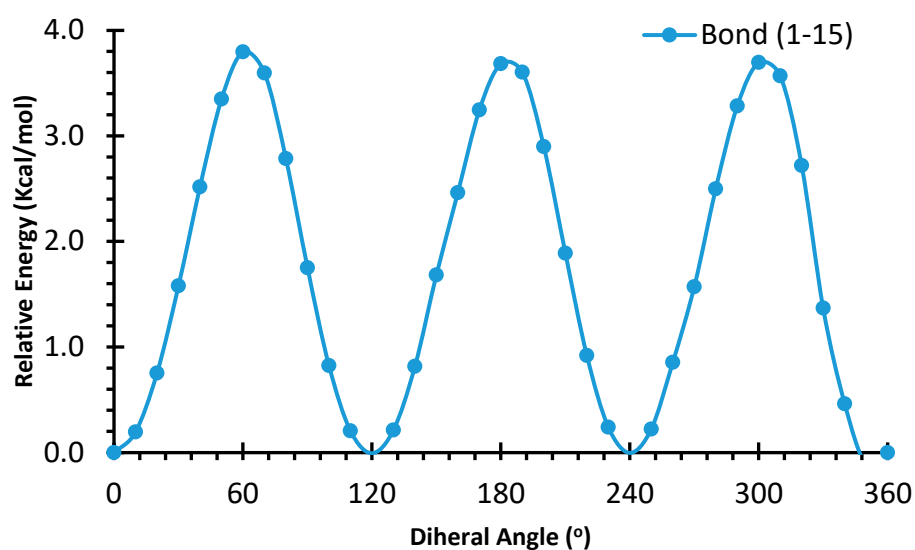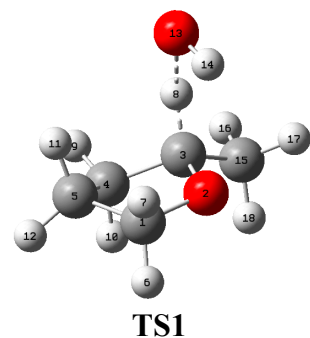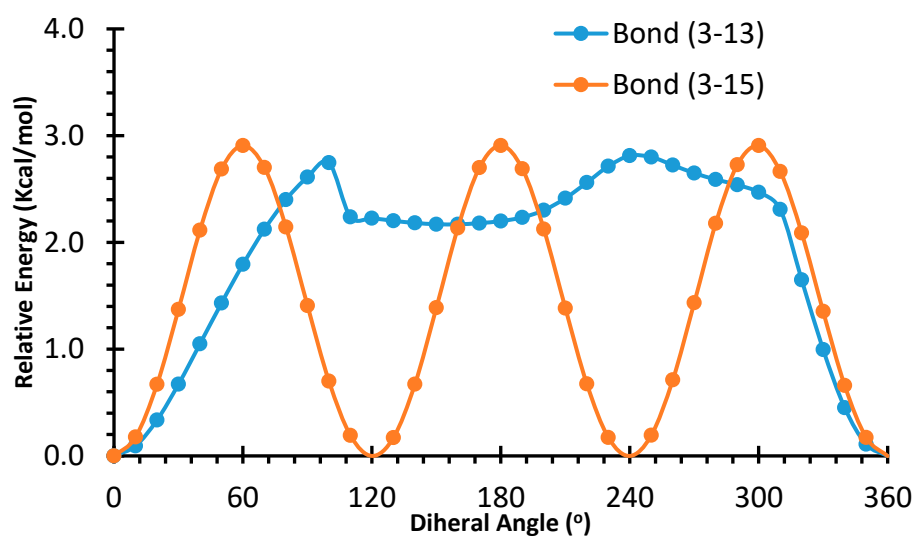

## Species

## Potential energy surfaces for the internal rotations

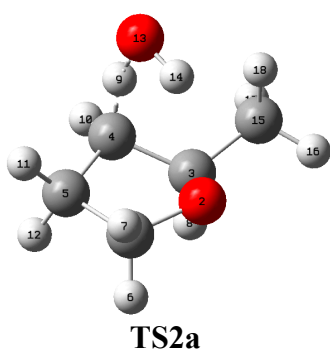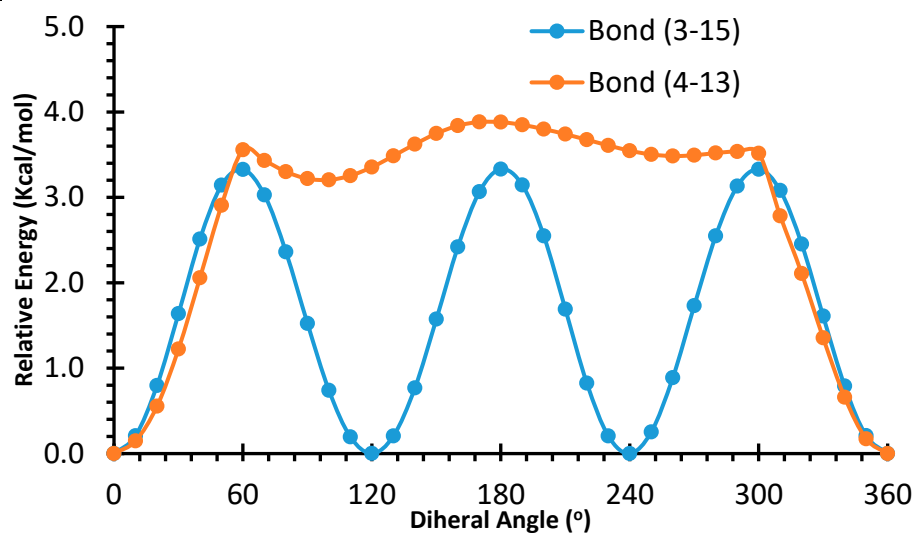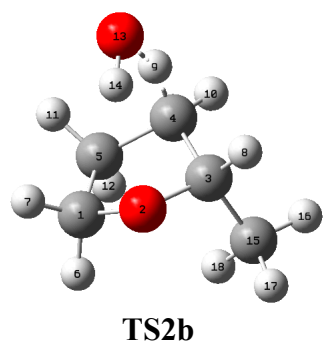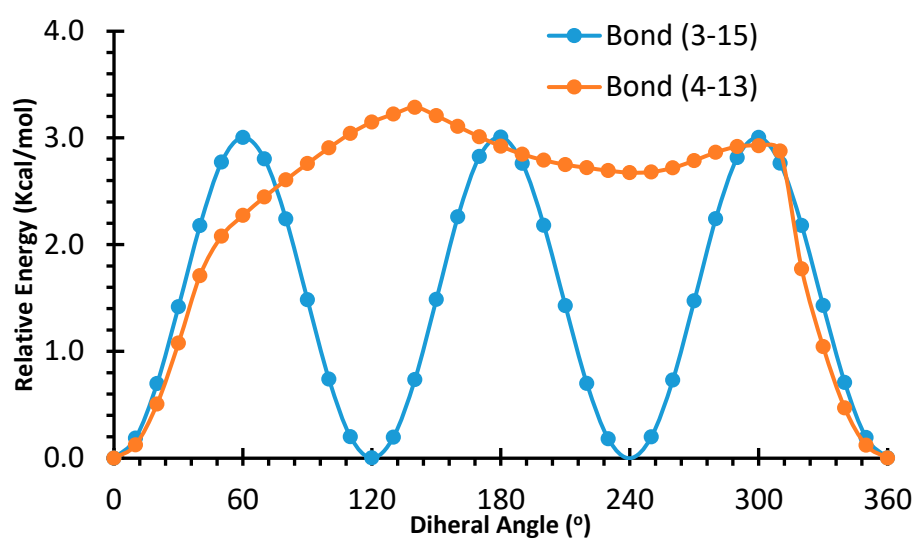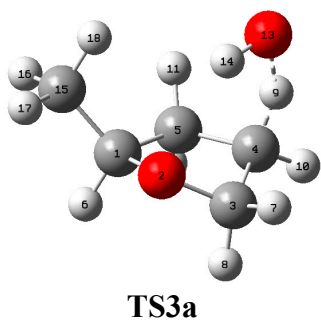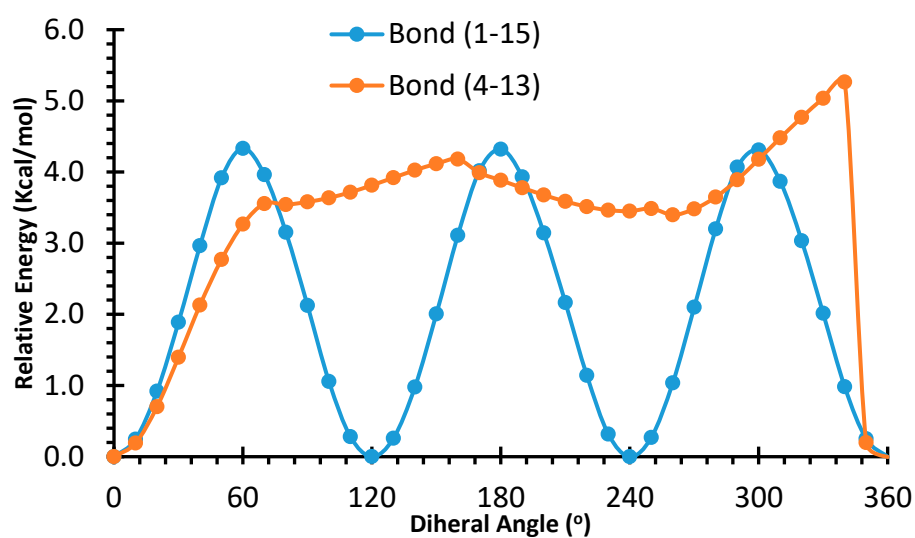



## Species

## Potential energy surfaces for the internal rotations

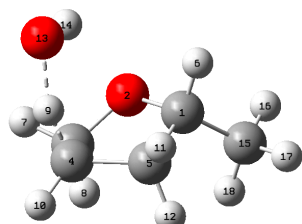

TS3b

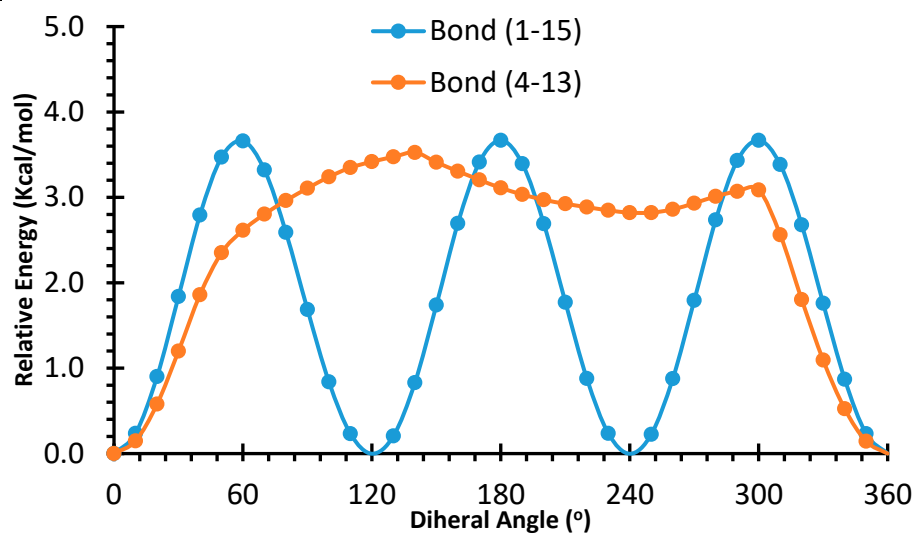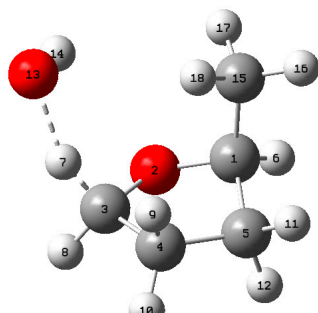

TS4a

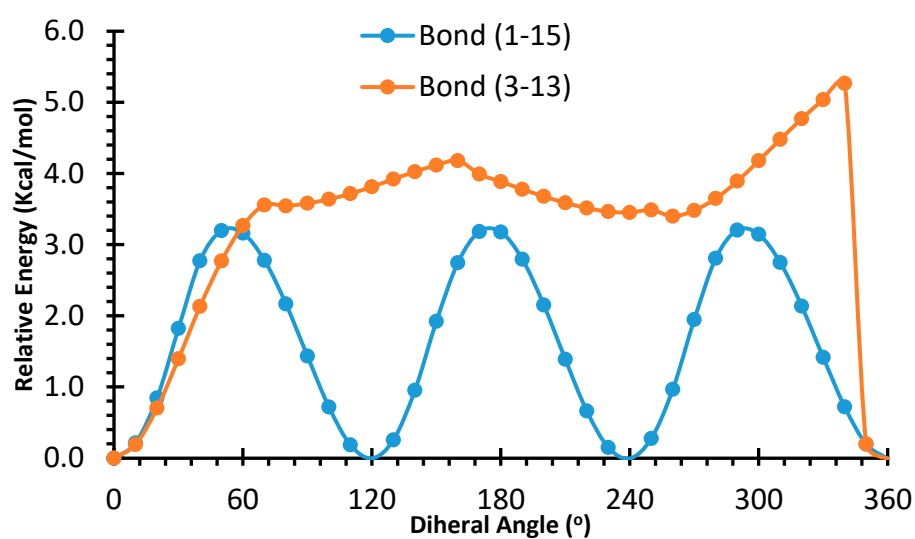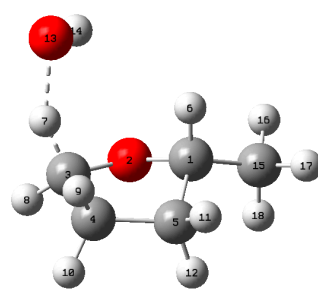

TS4b

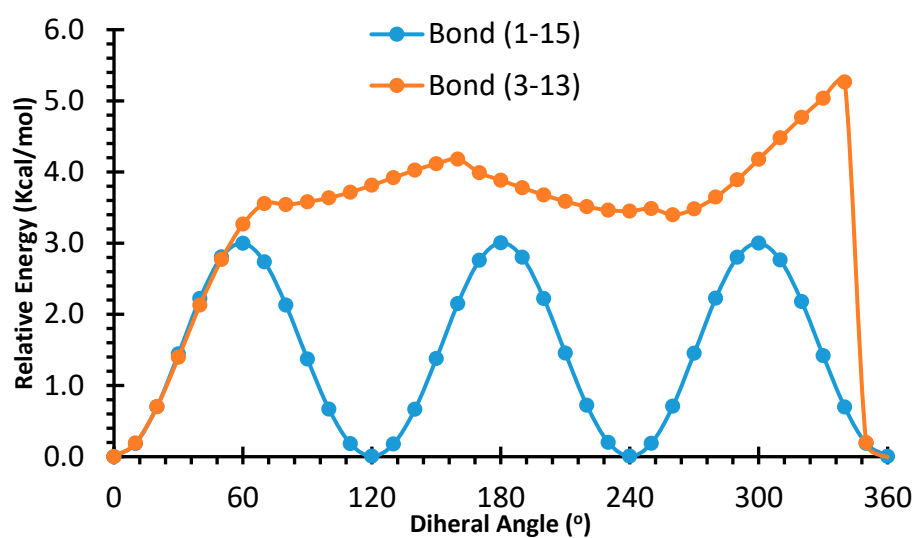

## Species

## Potential energy surfaces for the internal rotations

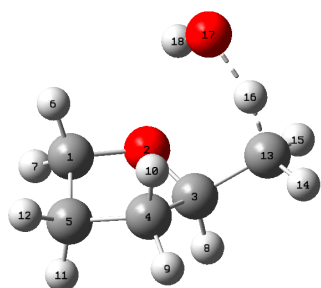

TS5

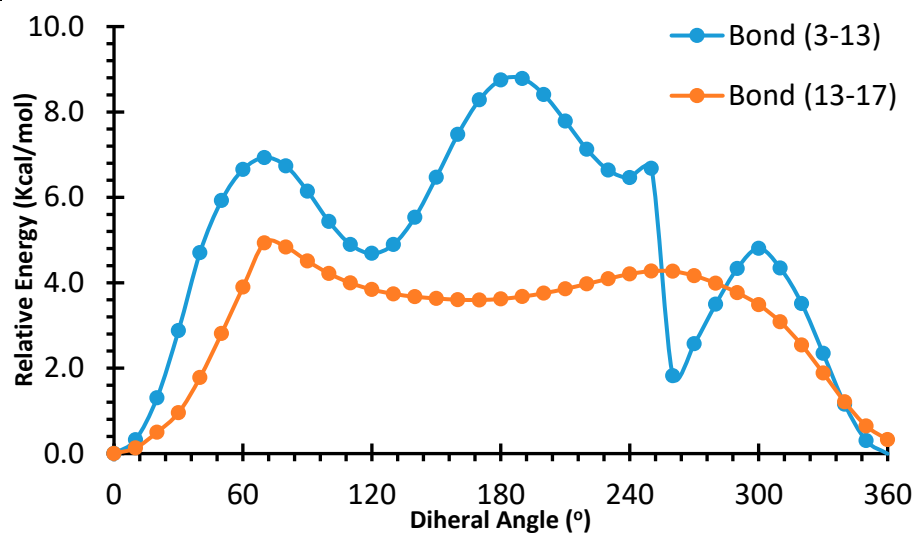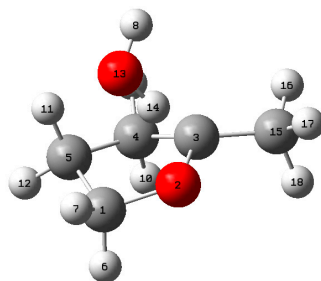

PC1

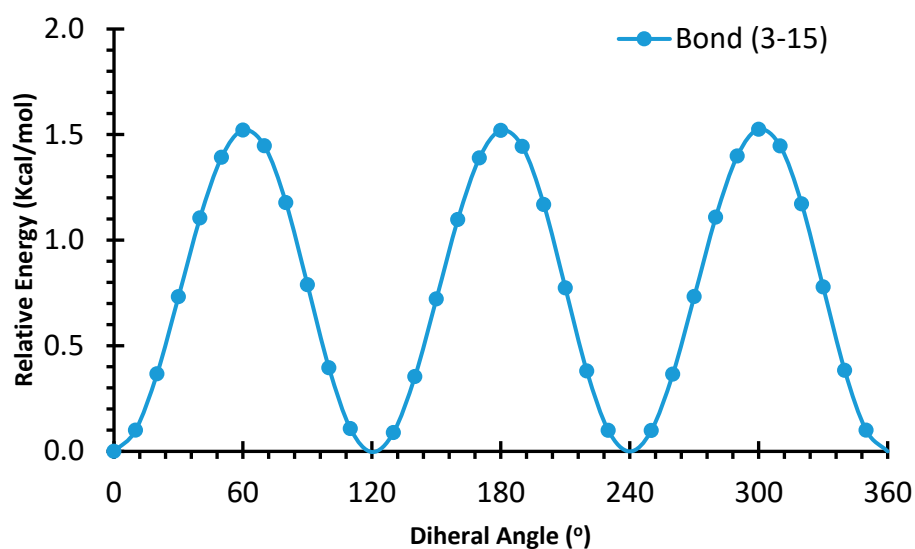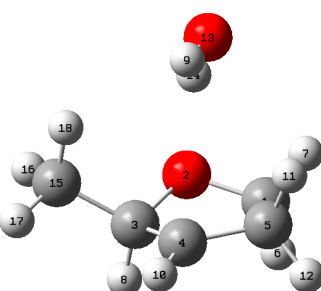

PC2

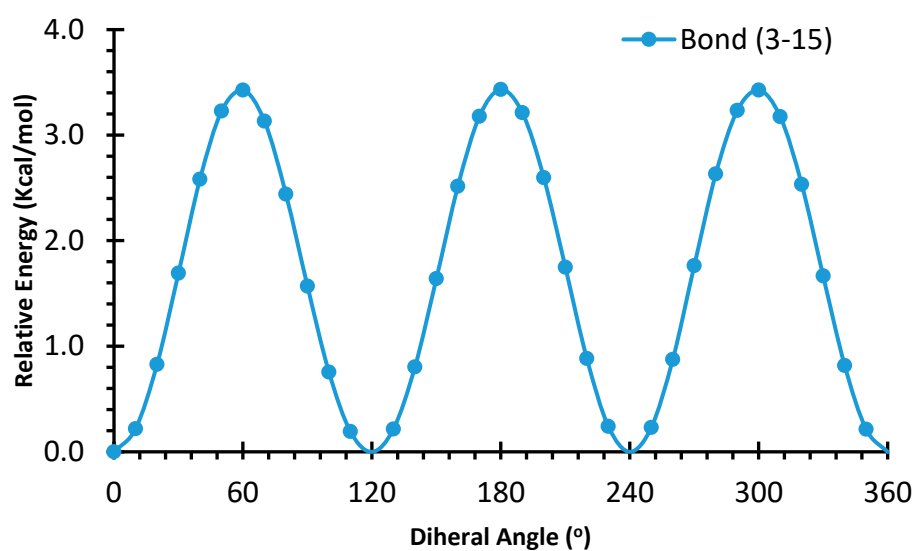

## Species

## Potential energy surfaces for the internal rotations

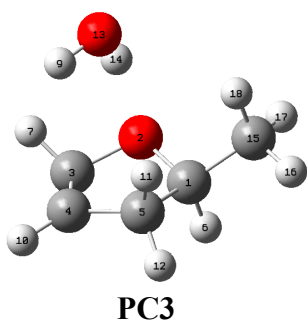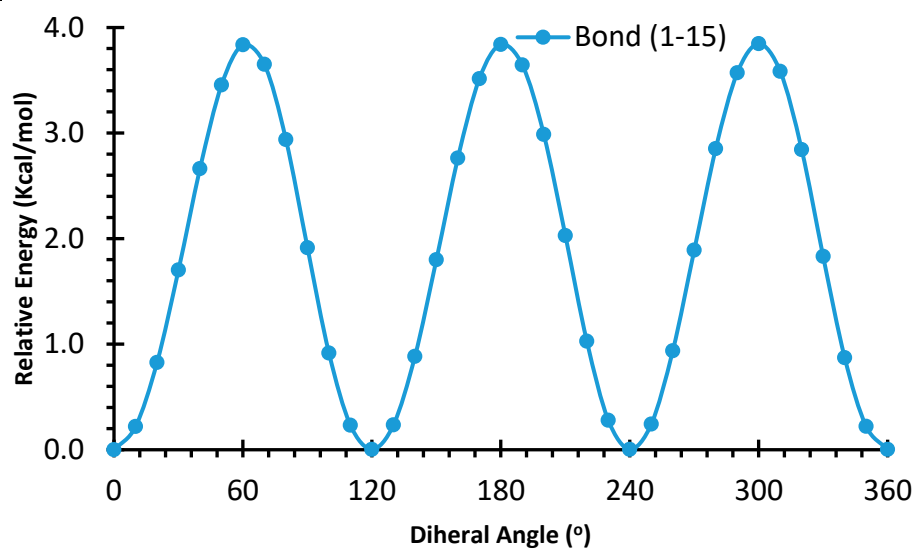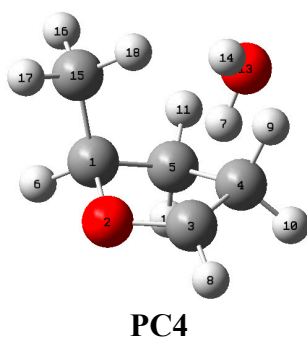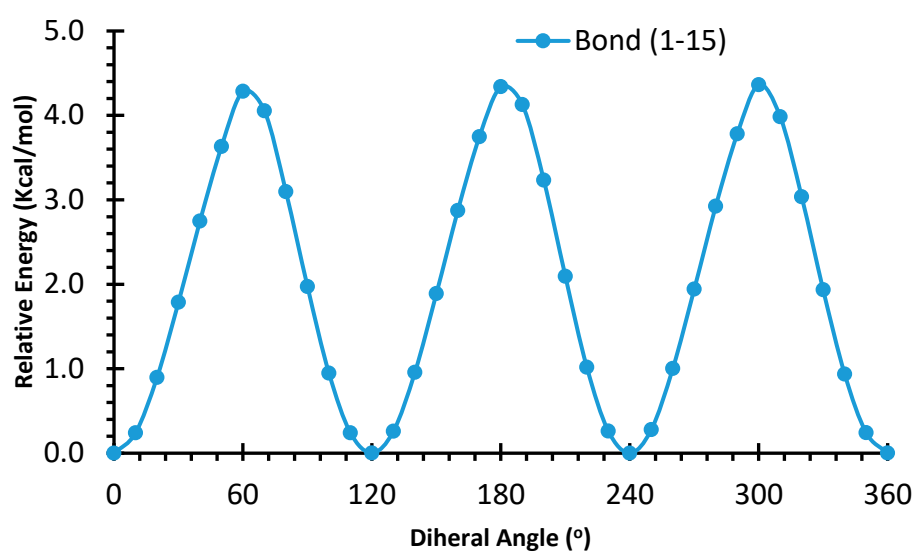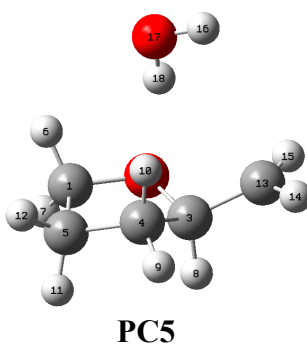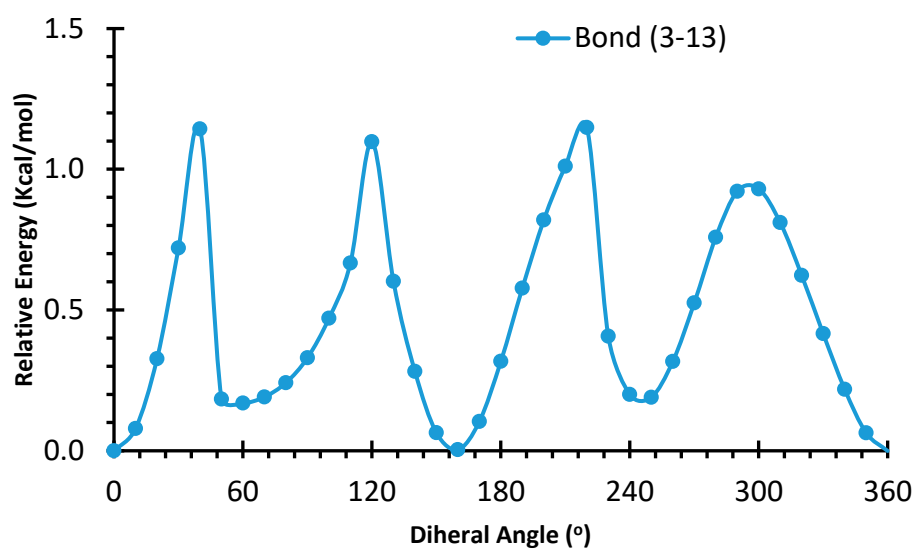

## Species

## Potential energy surfaces for the internal rotations

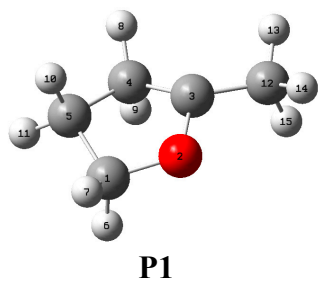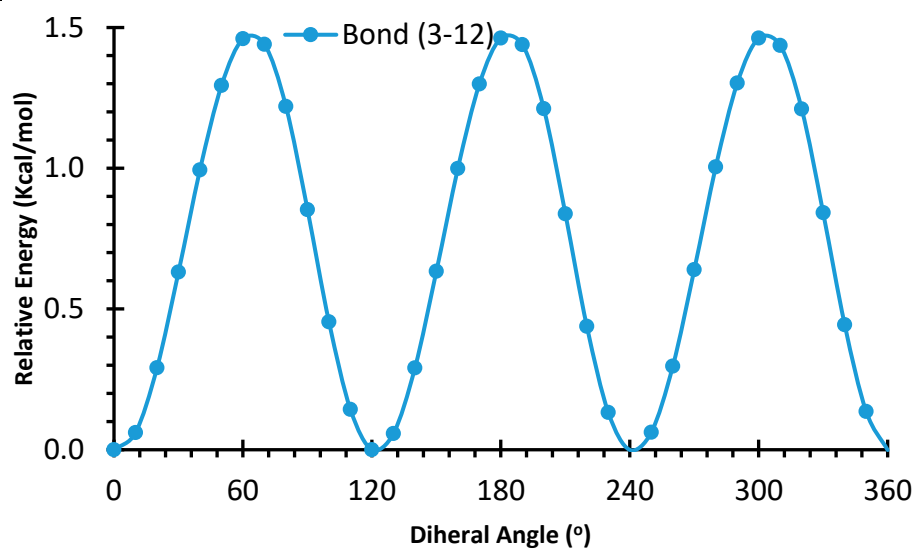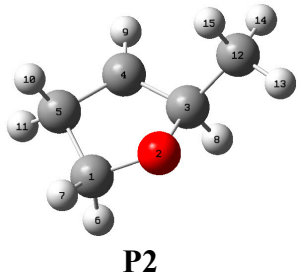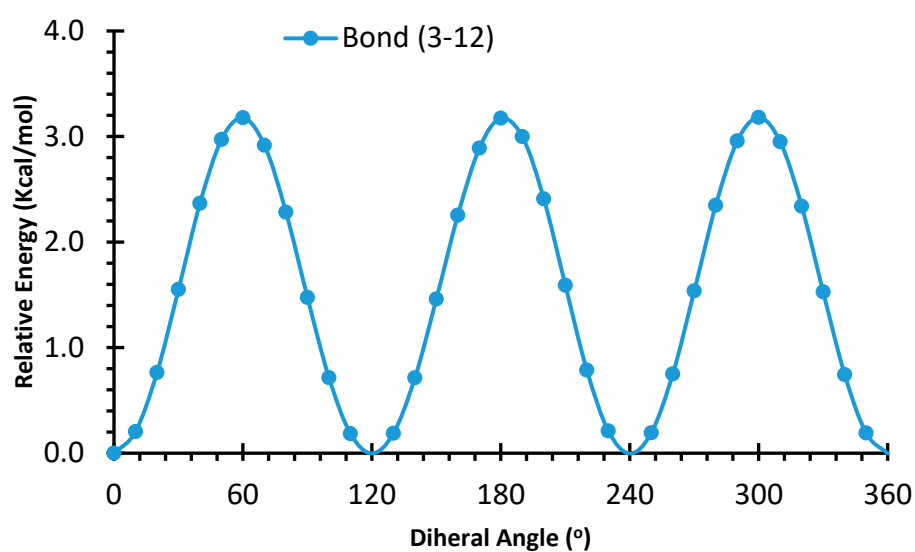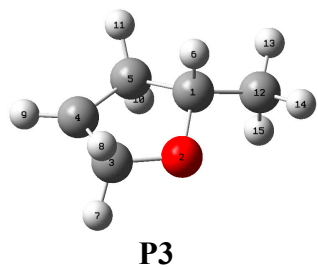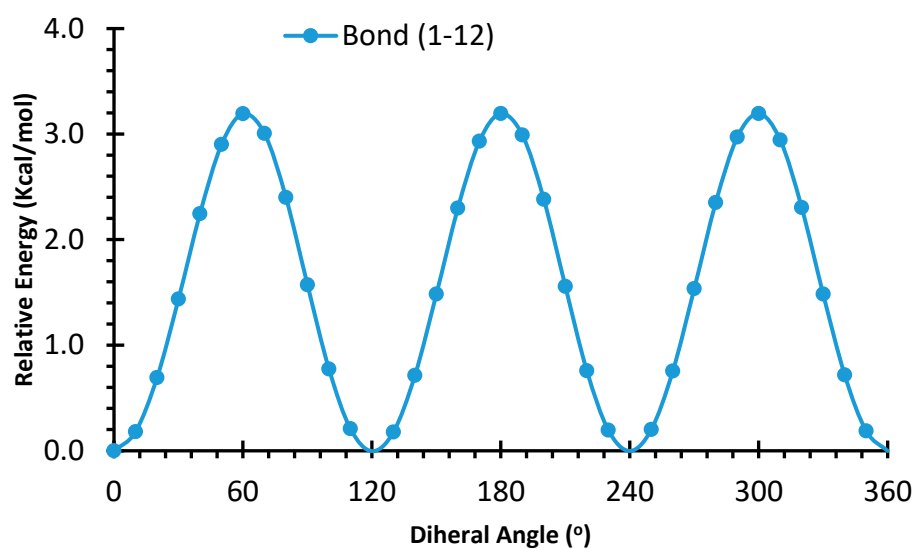

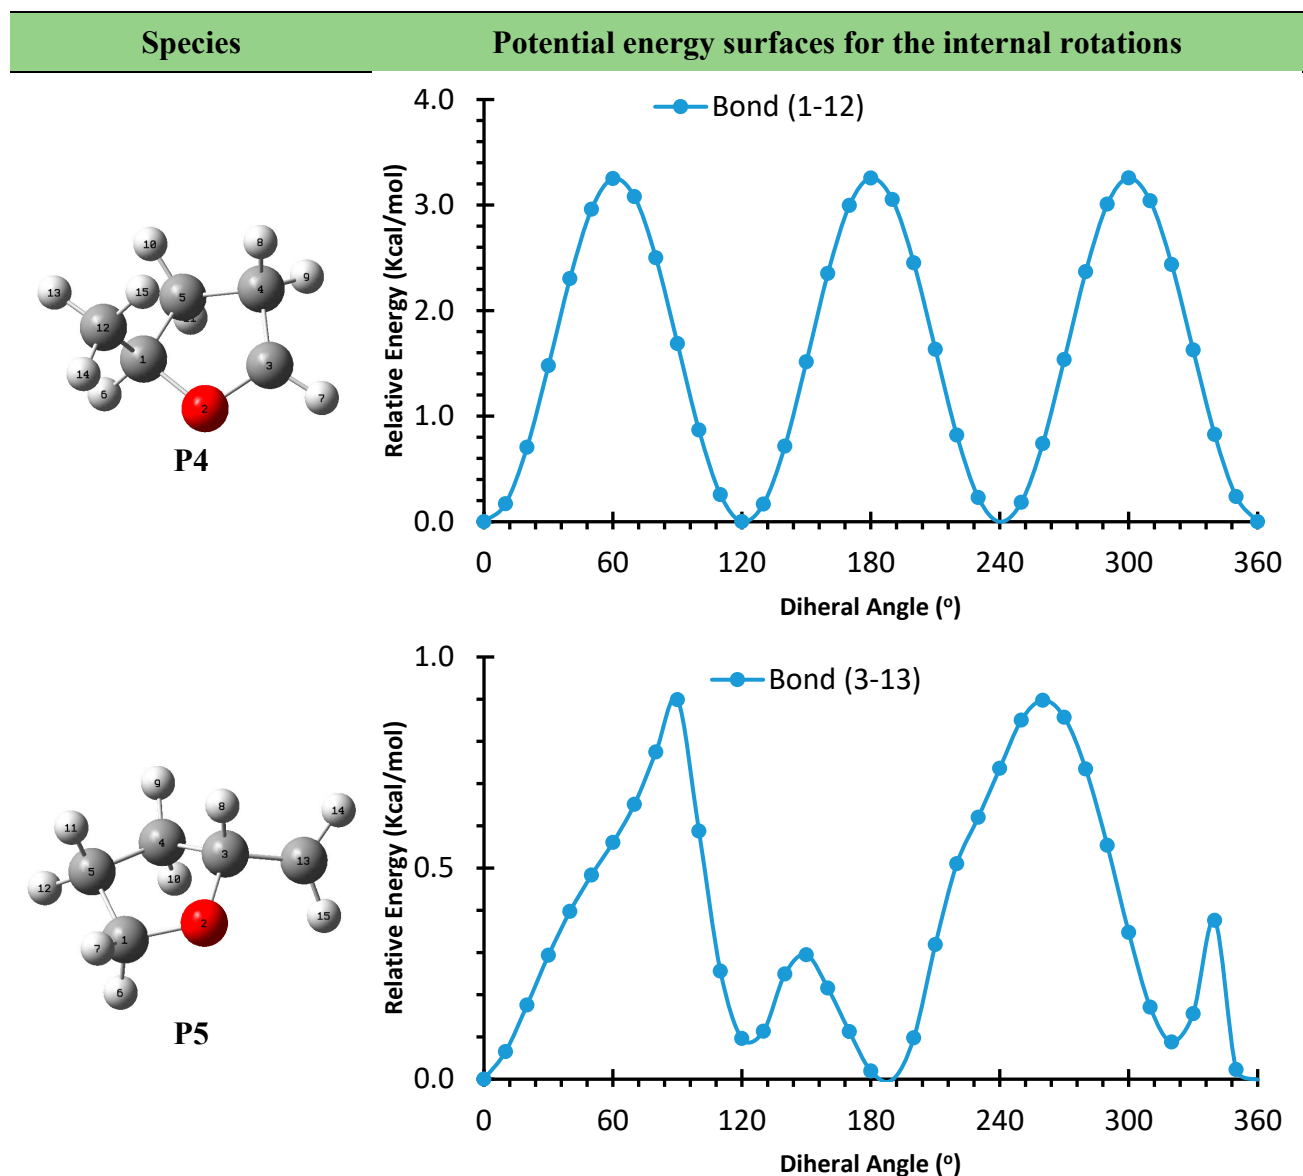

**Figure S2:** Hindrance potentials for the species involved in the 2MTHF + OH reaction, calculated at M06-2X/cc-pVDZ level of theory.

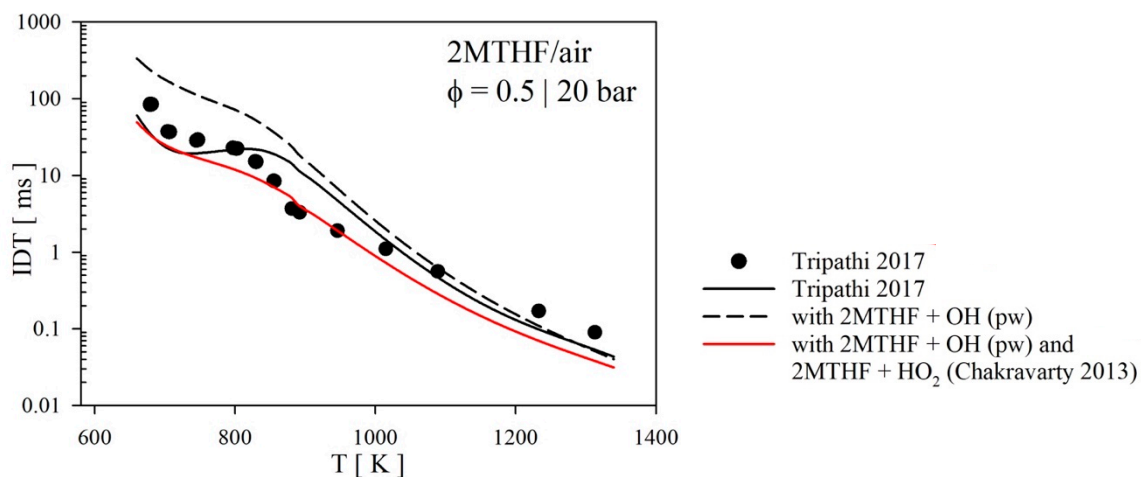

**Figure S3:** Effects of updated rate coefficients for  $\text{OH}/\text{HO}_2 + 2\text{MTHF} \rightarrow \text{products}$  on the prediction of the ignition delay times of 2MTHF/air mixtures at 20 bar and  $\phi = 0.5$ . The experimental data are taken from Tripathi et al. [4]. The comparison of the various scenarios for the performance of the kinetic model is shown. The red line shows the performance of the updated kinetic model from this work with the rate coefficients for  $\text{OH} + 2\text{MTHF} \rightarrow \text{products}$  (this work) and  $\text{HO}_2 + 2\text{MTHF} \rightarrow \text{products}$  (Chakravarty and Fernandes [5]).

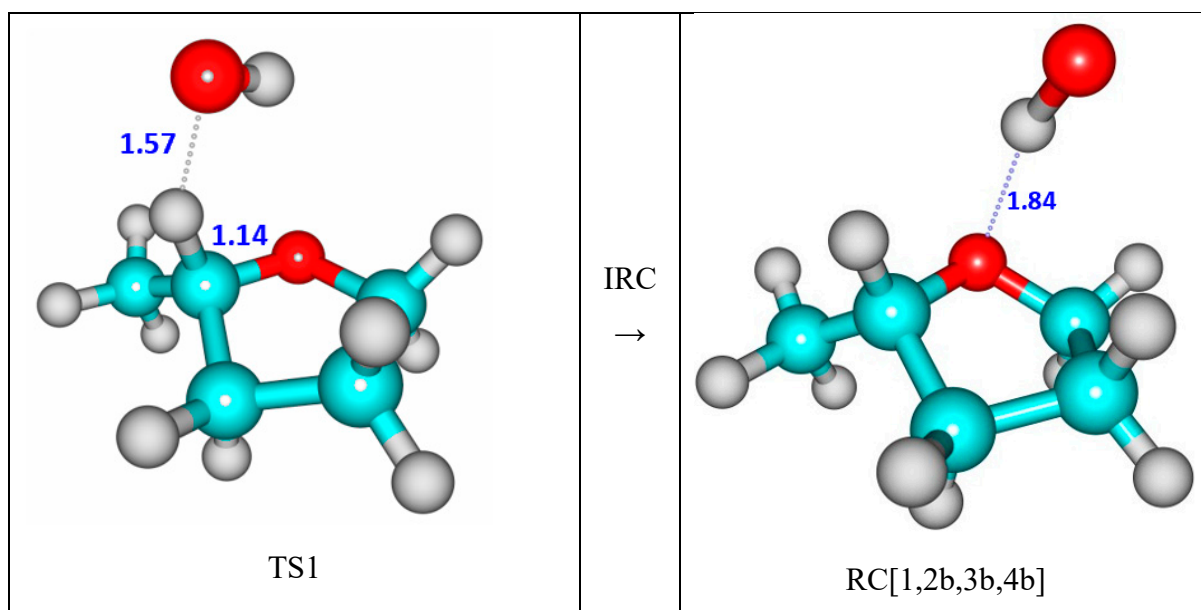

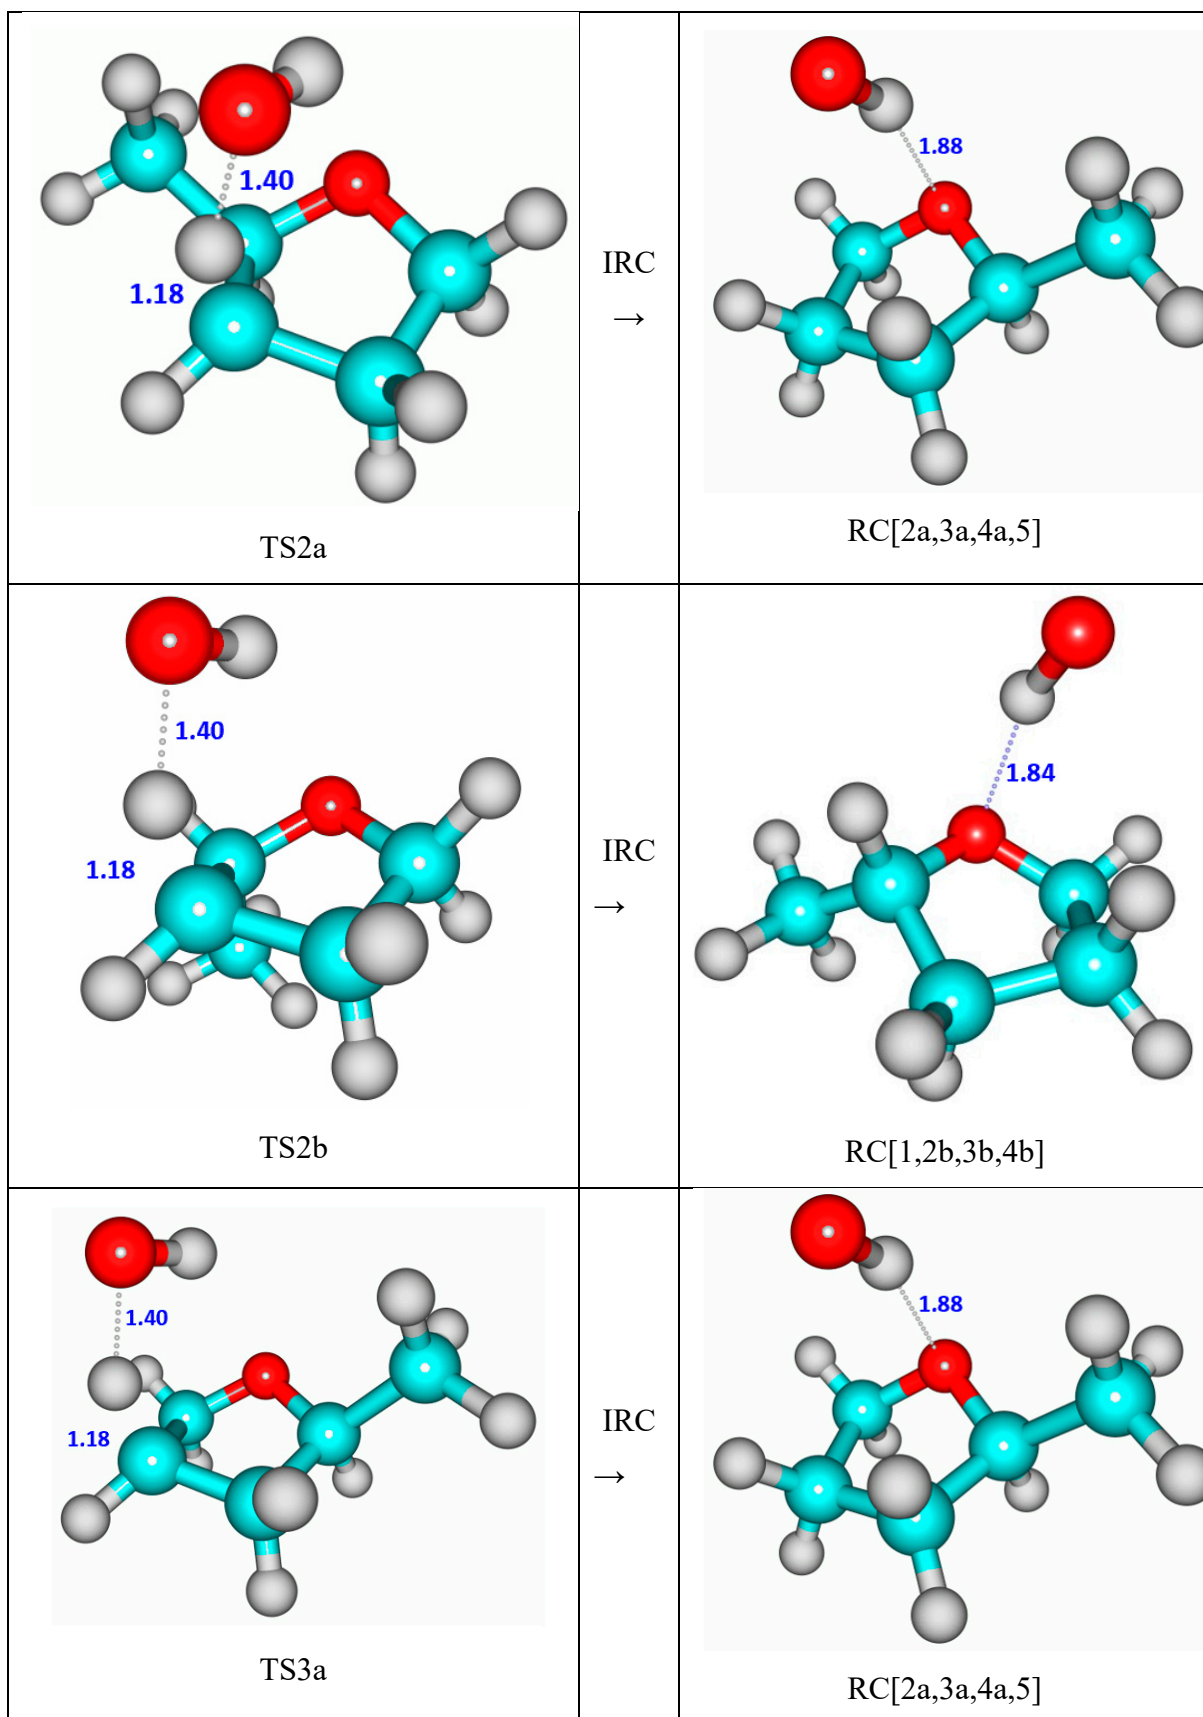

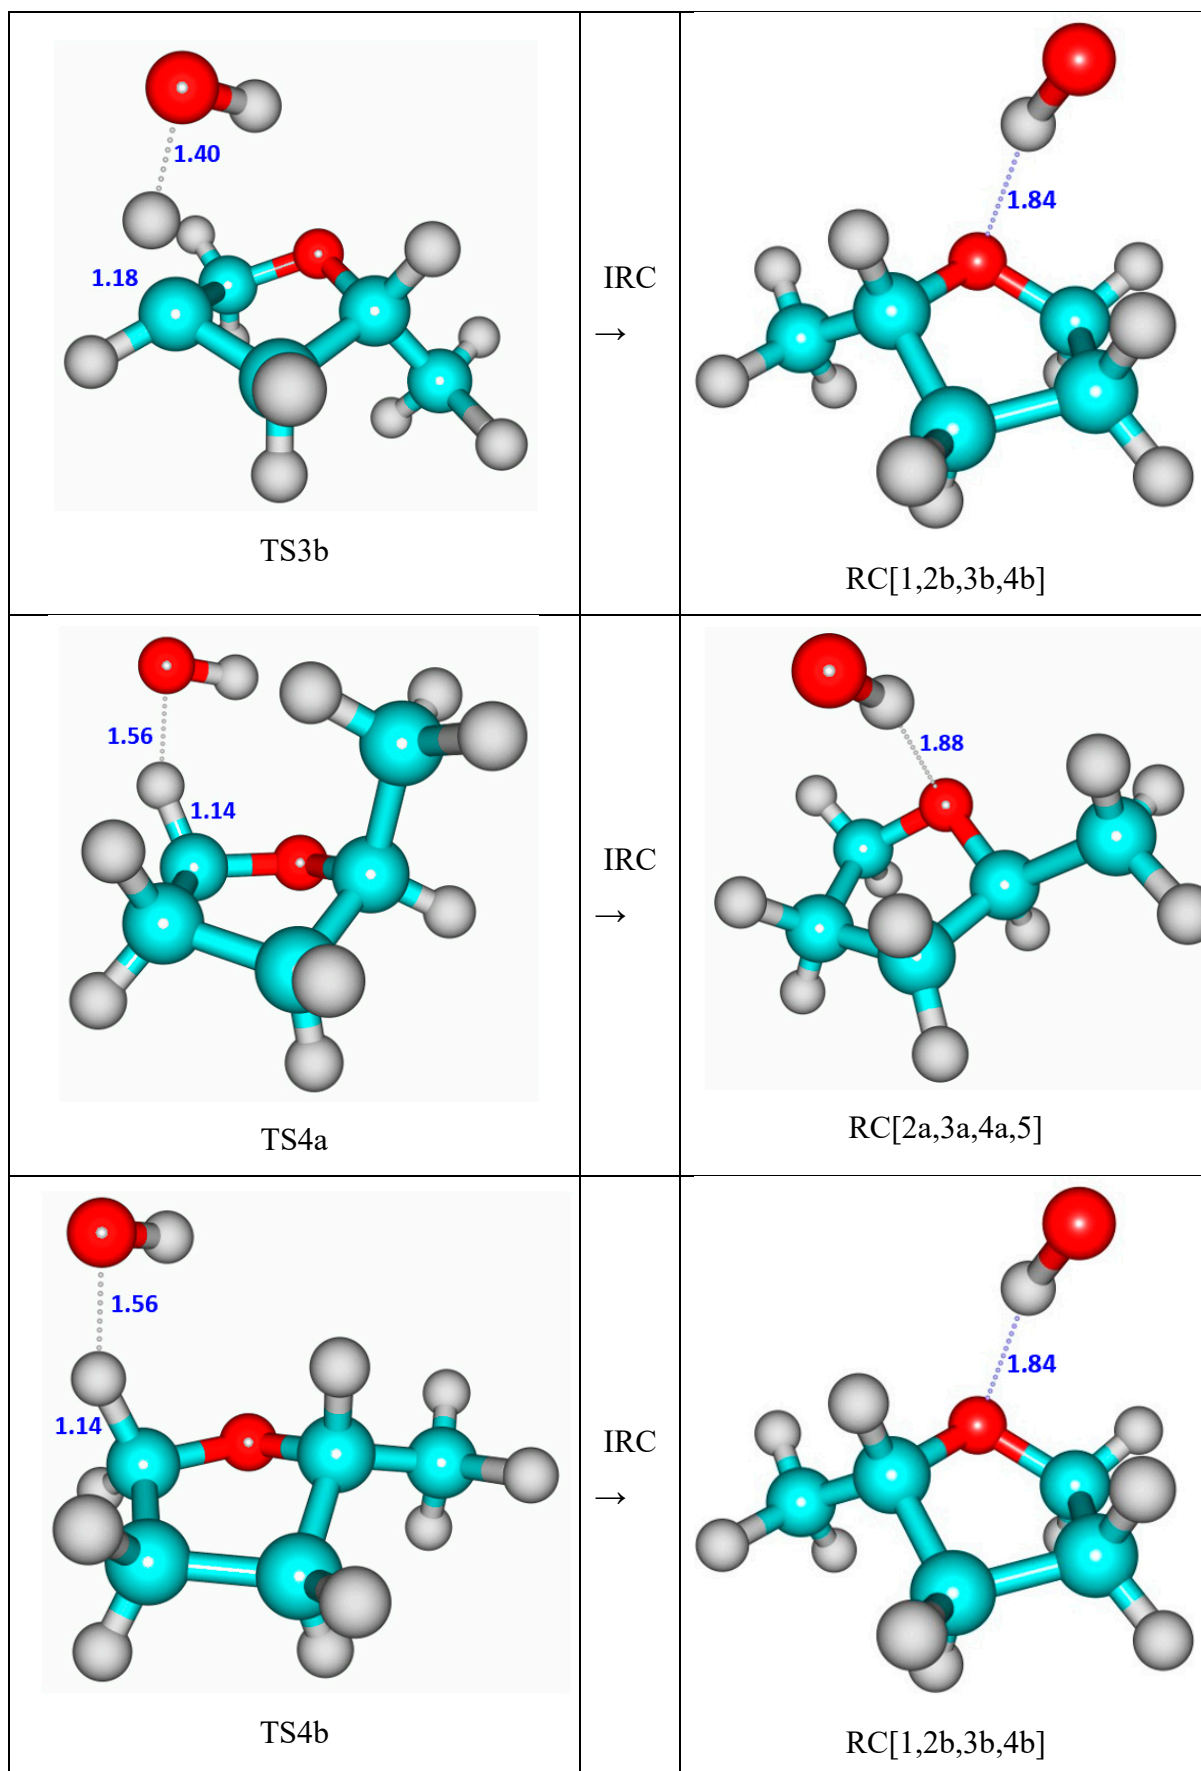



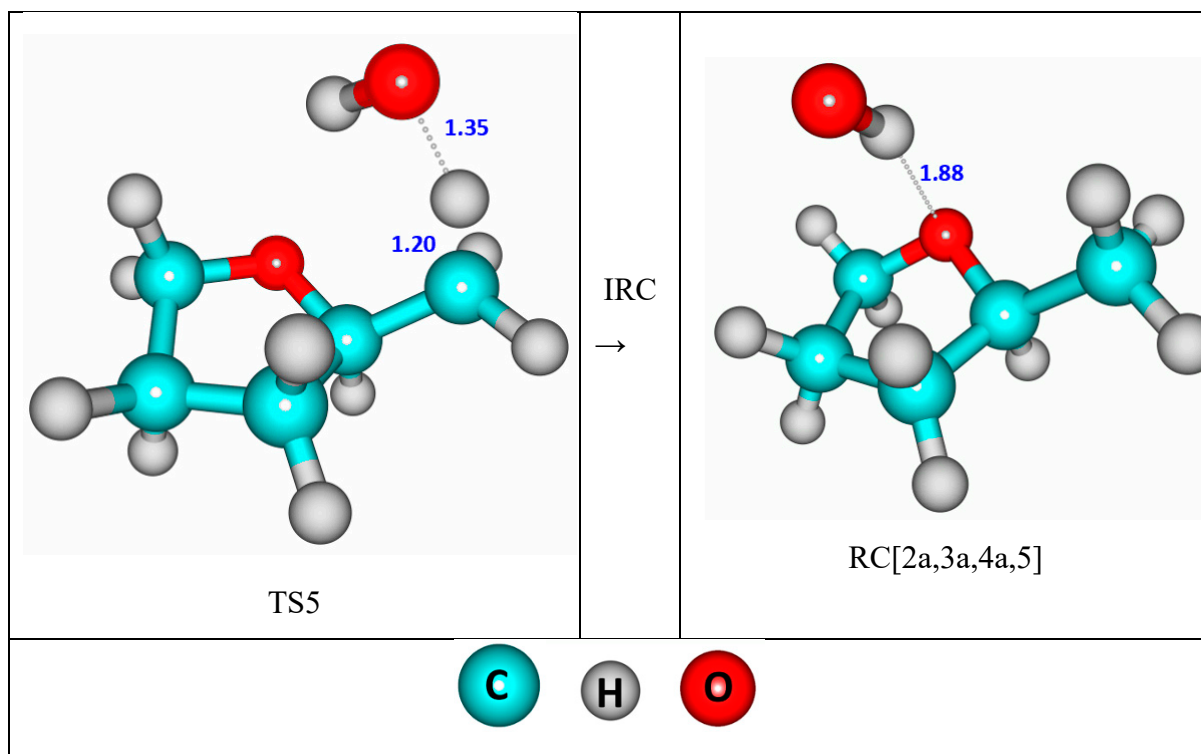

**Figure S4:** Optimized TSs and corresponding RCs obtained at M06-2X/aug-cc-pVTZ level.

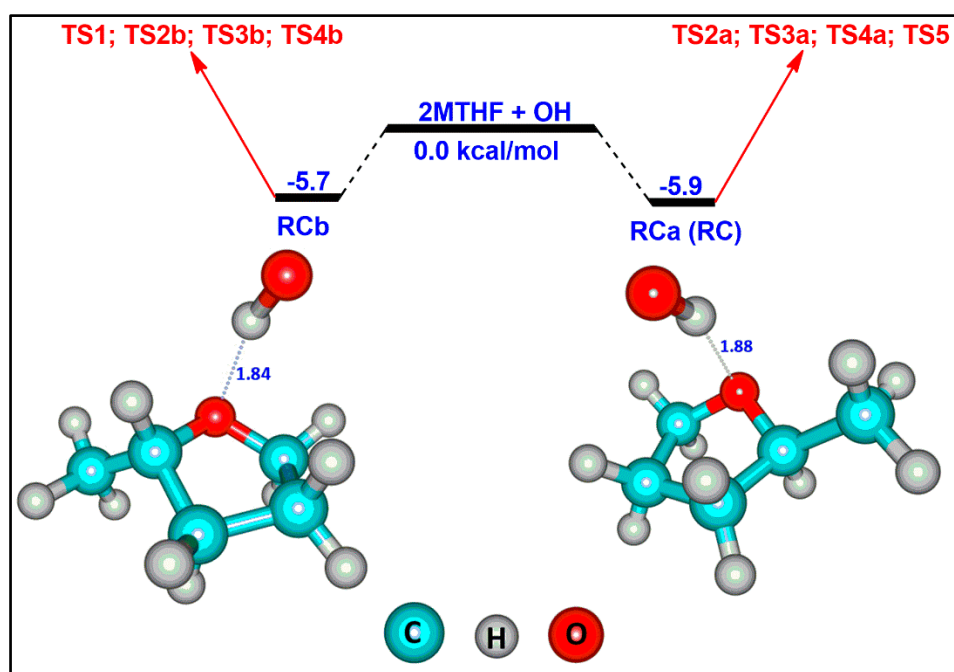

**Figure S5:** Simplified PES for the formation of RCs from 2MTHF and OH radical (+ZPE, 0 K) calculated at CCSD(T)/cc-pVTZ//M06-2X/aug-cc-pVTZ.

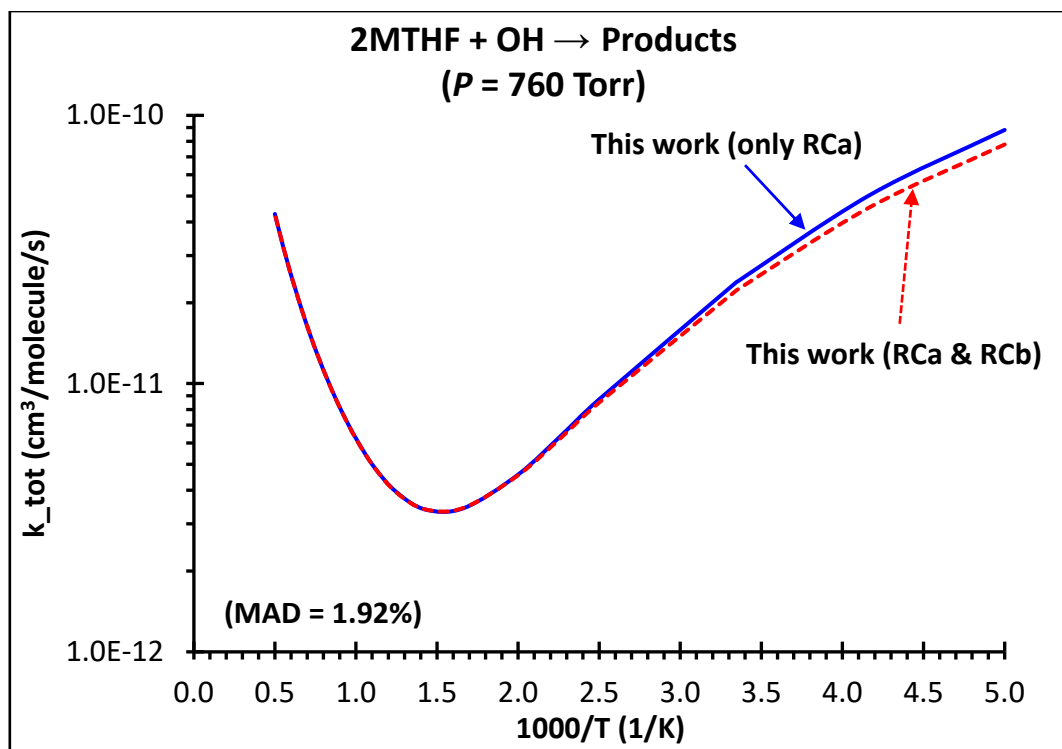

**Figure S6:** Comparison of the computed global rate constants ( $2\text{MTHF} + \text{OH} \rightarrow \text{products}$ ) using one-RC (**RCa**) and two-RC models (**RCa & RCb**) at  $P = 760$  Torr.

#### References:

1. Huber, K. P.; Herzberg, G., *Molecular Spectra and Molecular Structure. IV. Constants of Diatomic Molecules*. Van Nostrand Reinhold Co: 1979.
2. Shimanouchi, T., *Tables of Molecular Vibrational Frequencies, Consolidated Volume I, NSRDS NBS-39*. (<https://nvlpubs.nist.gov/nistpubs/Legacy/NSRDS/nbsnsrds39.pdf>)
3. Hoy, A. R.; Bunker, P. R., A precise solution of the rotation bending Schrödinger equation for a triatomic molecule with application to the water molecule. *J. Mol. Spectrosc.* **1979**, 74, (1), 1-8.
4. Tripathi, R.; Lee, C.; Fernandes, R. X.; Olivier, H.; Curran, H. J.; Mani Sarathy, S.; Pitsch, H., Ignition characteristics of 2-methyltetrahydrofuran: An experimental and kinetic study. *Proc. Combust. Inst.* **2016**, 36, (1), 587-595.
5. Chakravarty, H. K.; Fernandes, R. X., Reaction kinetics of hydrogen abstraction reactions by hydroperoxyl radical from 2-methyltetrahydrofuran and 2,5-dimethyltetrahydrofuran. *J. Phys. Chem. A* **2013**, 117, (24), 5028-41.
